# 1 **KIF1A is kinetically tuned to be a super-engaging motor under hindering loads**

2

3 Serapion Pyrpassopoulos<sup>a,+</sup>, Allison M. Gicking<sup>b</sup>, Taylor M. Zaniewski<sup>b,c</sup>, William O.  
4 Hancock<sup>b</sup>, and E. Michael Ostap<sup>a</sup>

5

6 <sup>a</sup> Pennsylvania Muscle Institute, Department of Physiology, and the Center for  
7 Engineering Mechanobiology, University of Pennsylvania, Perelman School of Medicine,  
8 Philadelphia, Pennsylvania 19104

9 <sup>b</sup> Department of Biomedical Engineering, Pennsylvania State University, University Park,  
10 PA 16802

11 <sup>c</sup> Department of Chemistry, Pennsylvania State University, University Park, PA 16802

12 <sup>+</sup> Current address: Center for Plant Molecular Biology (ZMBP), University of Tübingen,  
13 Auf der Morgenstelle 32, 72076 Tübingen, Germany

14

## 15 **Abstract**

16 KIF1A is a highly processive vesicle transport motor in the kinesin-3 family. Mutations in  
17 KIF1A lead to neurodegenerative diseases including hereditary spastic paraplegia. We  
18 applied optical tweezers to study the ability of KIF1A to generate and sustain force against  
19 hindering loads. We used both the three-bead assay, where force is oriented parallel to  
20 the microtubule, and the traditional single-bead assay, where force is directed along the  
21 radius of the bead, resulting in a vertical force component. The average force and  
22 attachment duration of KIF1A in the three-bead assay were substantially greater than  
23 those observed in the single-bead assay. Thus, vertical forces accelerate termination of  
24 force ramps of KIF1A. Average KIF1A termination forces were slightly lower than the  
25 kinesin-1 KIF5B, and the median attachment duration of KIF1A was >10-fold shorter than  
26 KIF5B under hindering loads. KIF1A rapidly reengages with microtubules after  
27 detachment, as observed previously. Strikingly, quantification enabled by the three-bead  
28 assay shows that reengagement largely occurs within 2 ms of detachment, indicating that  
29 KIF1A has a nearly tenfold faster reengagement rate than KIF5B. We found that rapid  
30 microtubule reengagement is not due to KIF1A's positively charged loop-12; however,  
31 removal of charge from this loop diminished the unloaded run length at near physiological

32 ionic strength. Both loop-12 and the microtubule nucleotide state have modulatory effects  
33 on reengagement under load, suggesting a role for the microtubule lattice in KIF1A  
34 reengagement. Our results reveal adaptations of KIF1A that lead to a novel model of  
35 super-engaging transport under load.

36

37

## 38 Introduction

39 KIF1A is a cytoskeletal motor in the kinesin-3 family that transports intracellular  
40 cargo in axons and dendrites (1, 2). A number of human mutations in KIF1A have been  
41 identified that lead to neurodegenerative diseases, termed KIF1A Associated  
42 Neurological Disorders (KAND) (3, 4). KIF1A is functionally distinctive in the kinesin  
43 superfamily in that it has a fast-stepping rate and enhanced processivity in the absence  
44 of mechanical loads compared to other characterized motors. A positively charged loop-  
45 12 insert, the “K-loop,” is unique to the kinesin-3 family and has been linked to the motor’s  
46 superprocessive behavior (Fig. 1A) (5, 6). However, single-molecule experiments found  
47 the K-loop did not contribute to the superprocessivity of KIF1A dimers at low ionic strength  
48 (7-9). Despite being superprocessive, mechanical loads that resist plus end-directed  
49 stepping cause KIF1A to detach from the microtubule more readily than the well-studied  
50 kinesin-1 (10-13).

51 A recent biochemical study exploring the mechanochemical adaptations of KIF1A  
52 suggested that rear-head detachment is an order of magnitude faster than found for  
53 kinesins-1 or -2, and that this feature helps to explain its rapid stepping rate. This kinetic  
54 feature also results in a predominant steady-state intermediate that is bound via a single  
55 “weakly-bound” post-hydrolysis motor domain through electrostatic interactions with the  
56 microtubule (14). This single-head microtubule interaction may result in a molecule that  
57 is vulnerable to detachment under mechanical load. Indeed, a recent study using a  
58 single-bead optical tweezer found that KIF1A bound for relatively short durations under  
59 load and generated stall forces of 3.1 pN, compared to 4.6 pN for kinesin-1 (13).  
60 Interestingly, KIF1A was found to recover processive stepping after detachment more  
61 readily than kinesin-1, and this property has been attributed to the unique K-loop (8, 14).

62 The specific sequences and biochemical tuning that underlie the superprocessivity  
63 and force sensitivity of KIF1A are still under investigation. The  $\alpha$ 4-helix, which forms a  
64 substantial part of the microtubule binding interface, is conserved between the kinesin-1  
65 and kinesin-3 families, but there are positively charged residues in loop-8, loop-11, and  
66 the  $\alpha$ 6-helix of KIF1A that, when substituted for their kinesin-1 counterparts, reduce the  
67 unloaded run length substantially (15). Furthermore, the N-terminal cover strand of  
68 kinesin-3, which stabilizes the docked neck linker and contributes to force generation, is

69 shorter than that of kinesin-1 and forms a less extensive hydrogen bonding network with  
70 the motor domain and neck linker (13, 16). These unique structural features within the  
71 catalytic core and at the motor-microtubule interface raise the possibility that KIF1A motor  
72 kinetics are affected by force differently than kinesin-1.

73         Given the unique connection between the neck-linker and motor of KIF1A, it is  
74 important to consider how the geometry of forces applied to the motor affects its  
75 mechanochemistry. The single-bead assay (Fig. 1B), which is commonly used for  
76 measuring the force generated by kinesin motors (including KIF1A (13, 17)), introduces  
77 a vertical component to the force applied to the kinesin due to contact of the bead with  
78 the underlying surface-immobilized microtubule (18, 19). This vertical force component  
79 acts to separate the motor from the microtubule. Vertical forces can be minimized by  
80 using a three-bead assay (Fig. 1C), in which the motor is attached to a surface-  
81 immobilized bead and a microtubule “dumbbell” is held above it by two laser-trapped  
82 beads attached near the microtubule ends (19, 20). In recent work, it was found that the  
83 microtubule detachment rate of human kinesin-1, KIF5B, was substantially slower in the  
84 three-bead assay (19), suggesting that the vertical force inherent to the single-bead assay  
85 contributes to the measured motor detachment kinetics. Thus, given the recent finding  
86 that KIF1A detaches from microtubules more readily under force (13), it is important to  
87 examine the contribution of parallel and vertical forces to processive stepping.

88         In the present work, we investigated the performance of KIF1A in single- and three-  
89 bead optical trap assays and compared its performance to kinesin-1. We found that  
90 although KIF1A can achieve forces up to 6 pN, it is not a superprocessive motor under  
91 load. Rather, it is super-engaging, in that under opposing forces it readily disengages  
92 from the microtubule, but it quickly reengages and initiates a new force ramp within 2 ms.  
93 We also found that at near physiological ionic strengths, the K-loop contributes  
94 substantially to the unloaded run length, but only minimally to the load-dependent  
95 detachment kinetics. These results suggest that during vesicle transport in cells, where  
96 forces are predominantly oriented parallel to the microtubule, KIF1A is able to detach and  
97 rapidly recover motility under load, an adaptation that facilitates bidirectional transport  
98 and navigation around obstacles.

99

## 100 Results

### 101 ***KIF1A generates comparable forces to KIF5B and reengages more frequently with*** 102 ***the microtubule.***

103 To probe the force generating properties of KIF1A, we used optical tweezers in  
104 both a single-bead and three-bead configuration (Fig. 1B and C) at saturating ATP (2  
105 mM). Because full length KIF1A molecules adopt an auto-inhibited conformation (3, 21,  
106 22), we used a *Rattus norvegicus* KIF1A construct consisting of the motor and neck coil  
107 domains dimerized by a GCN4 leucine zipper and followed by a GFP (7) (Fig. 1A). KIF1A  
108 concentrations used in the optical tweezers experiments were sufficiently low to ensure  
109 that observed interactions are due to single KIF1A dimers (see Materials and Methods).

110 In the single-bead assay, KIF1A molecules pulled the bead out of the center of the  
111 stationary optical trap to forces of  $\sim 4$  pN (Fig. 1D). Terminations of force ramps were  
112 followed by strictly monotonic decreases in force as the bead relaxed back toward the  
113 center of the optical trap. By averaging many such events, we found that the relaxation  
114 time was  $\leq 2$  ms, which is near the expected relaxation time of a single bead in the  
115 absence of any interactions with the microtubule (see Supporting Information; Fig. S1)  
116 (23). These rearward displacements may reflect complete dissociation of KIF1A from the  
117 microtubule; alternatively, they could reflect KIF1A slipping backwards while maintaining  
118 weak association with the microtubule, as shown previously for KIF5B (24, 25). As we  
119 cannot differentiate between these attachment states, we refer to the force value at the  
120 termination of each force ramp as the *termination force* ( $F_{\text{term}}$ ; Fig. 1D and F). We refer  
121 to this transition at  $F_{\text{term}}$  as *disengagement* of the motor from the microtubule.

122 Following disengagement, KIF1A quickly reengages with the surface-immobilized  
123 microtubule and resumes forward motion (Fig. 1 D). Successive KIF1A force ramps were  
124 more closely spaced in time than those measured for KIF5B under identical assay  
125 conditions. The maximal KIF1A termination forces ( $F_{\text{term}}$ ) of  $\sim 4$  pN were lower than KIF5B,  
126 and the duration of the force ramps, defined as the engagement time ( $t_{\text{eng}}$ ), were shorter  
127 for KIF1A than for KIF5B (Fig. 1D and F). The lower forces and rapid reengagement

128 kinetics of KIF1A agree with a recent single-bead optical trapping study using a rat KIF1A  
129 construct (13).

130 In the single-bead assay, forces are applied to kinesin in directions both parallel  
131 and normal to the long-axis of the microtubule (Fig. 1B; (18, 19)). To investigate the force  
132 generating properties of KIF1A in the absence of this normal force component, we used  
133 the three-bead assay, in which the motor is attached to a surface-immobilized bead and  
134 a microtubule “dumbbell” is held above it by two laser-trapped beads attached near the  
135 microtubule ends (Fig. 1C; Materials and Methods). In the three-bead assay KIF1A  
136 developed maximal forces of ~6 pN, substantially larger than in the single-bead assay  
137 and close to the forces generated by KIF5B (see Results below). Notably, the durations  
138 of the KIF1A force ramps were still substantially shorter than observed for KIF5B (Fig. 1E  
139 and G). After disengaging, KIF1A rapidly reengaged and initiated the next force ramp  
140 before the dumbbell fully relaxed to the zero-force baseline. This rapid reengagement  
141 was rarely observed for KIF5B (Fig. 1G and I).

142

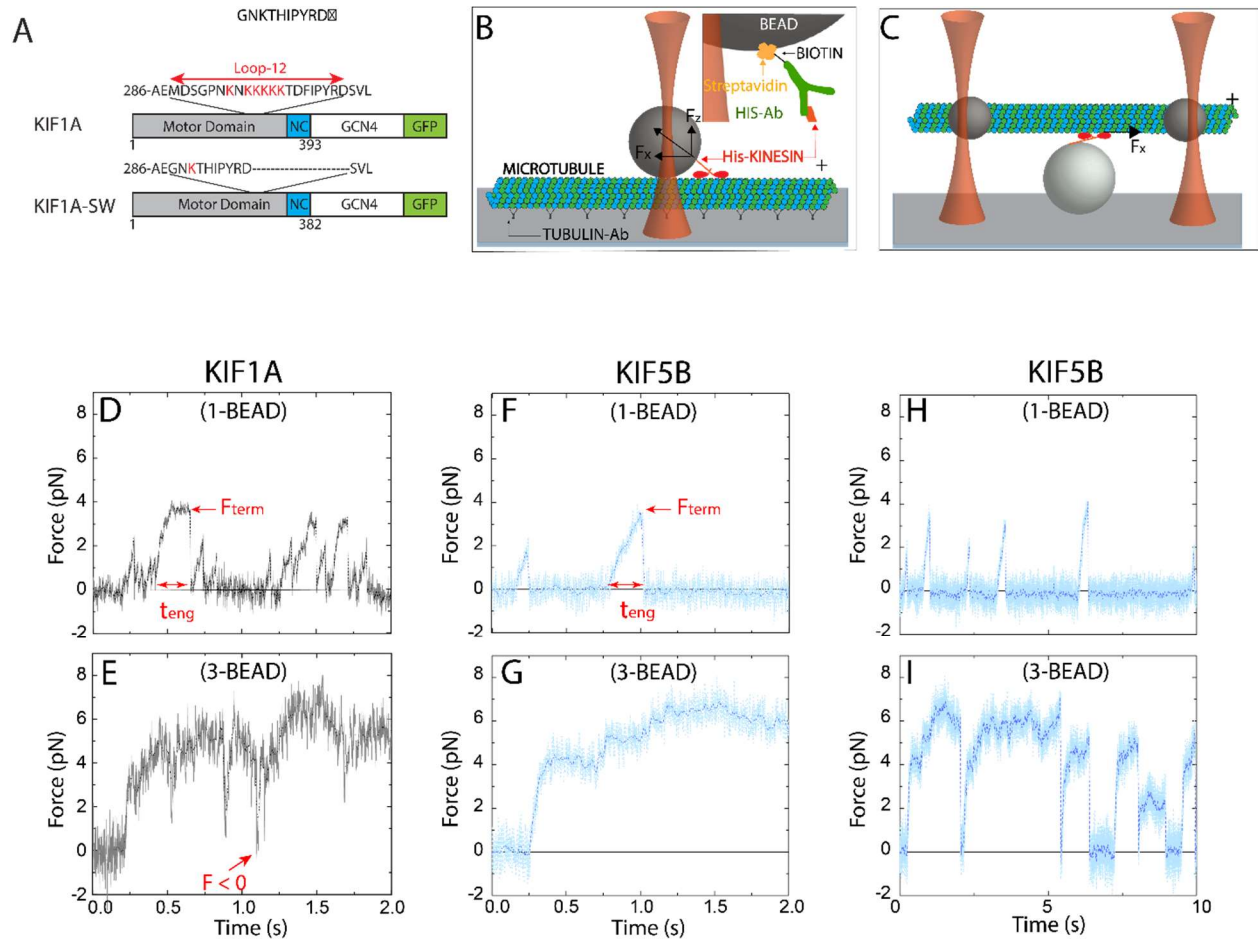

143

144 **Figure 1: KIF1A performance in single-bead and three-bead assays.**

145 (A) KIF1A constructs used in this study. Wild-type KIF1A consists of the motor domain  
 146 the neck coil region (NC) of rat KIF1A, followed by a leucine zipper dimerization domain  
 147 (GCN4) and a C-terminal GFP and His<sub>6</sub>-tag. In the KIF1A-SW swap mutant, the loop-12  
 148 was replaced by the corresponding sequence of *Drosophila* kinesin-1. (B and C): Diagram  
 149 of the (B) single-bead and (C) three-bead assays with attachment strategy (inset); beads  
 150 are not drawn to scale. (D and E): Representative force traces of KIF1A at 2 mM ATP in  
 151 (D) the single-bead assay and (E) the three-bead assay.  $F_{term}$  is defined as the force at  
 152 the termination of a force ramp and  $t_{eng}$  is defined as the duration of a force ramp. Red  
 153 arrow in (E) highlights instance of force after termination of a force ramp crossing the  
 154 zero-force baseline before initiating a new force ramp. (F and G): Force traces of KIF5B  
 155 using (F) the single-bead assay and (G) the three-bead assay with the same time axis as  
 156 D and E. (H and I): KIF5B force traces at expanded time scale, showing larger intervals  
 157 between force ramps and long force plateaus in the three-bead geometry.

158

159 ***In the absence of vertical forces KIF1A generates large pulling forces and***  
160 ***repetitively reengages with the microtubule.***

161 To isolate the influences of vertical and horizontal forces on KIF1A stepping, we  
162 quantified the force generating capacity of KIF1A and the microtubule reengagement  
163 kinetics following termination of a force ramp. A representative example of a long (>100  
164 s) trace that contains many consecutive KIF1A force ramps is shown in Fig. 2A. When  
165 the distribution of instantaneous forces was plotted (Fig. 2B), two clear modes were  
166 apparent: a peak around the zero-force baseline, and a peak around the average force  
167 where force ramps terminated. For our analysis, force ramps that initiated at forces within  
168 two standard deviations of the zero-force baseline were termed *primary events*, whereas  
169 force ramps that initiated at forces greater than two standard deviations from the baseline  
170 were termed *secondary events* (Fig. 2C and D). For KIF1A, 39% of the force ramps in the  
171 three-bead assay qualified as secondary events, whereas only 11% qualified as  
172 secondary events in the single-bead assay (Table S1). This difference may result from  
173 the microtubule remaining near the immobilized motor in the three-bead trap, whereas  
174 the motor position is less constrained in the single-bead trap due to potential rotation of  
175 the bead. It is also possible that tensile forces applied by the two traps on the microtubule  
176 in the three-bead assay (see Materials and Methods) may deform the microtubule lattice  
177 and thereby enhance motor re-engagement kinetics (26).

178 To characterize the mechanical performance of KIF1A against hindering loads, we  
179 quantified the distributions of termination forces,  $F_{\text{term}}$ , and the durations that motors  
180 engaged with microtubules before termination of a force ramp,  $t_{\text{eng}}$ . For both the single-  
181 bead and three-bead assay,  $\langle F_{\text{term}} \rangle$  was slightly higher for the secondary events relative  
182 to the primary ones (Fig 2E and F; Table S2). The higher forces may be expected,  
183 because primary events begin at lower initial forces, and hence require more time to build  
184 to higher forces; it also reflects the fact that motors usually disengaged before reaching  
185 a stable force. To better quantify disengagement kinetics, we compared the distribution  
186 of motor engagement times,  $t_{\text{eng}}$ , in the three-bead assay (Fig. 2G and H; values in Table  
187 S2). The median  $t_{\text{eng}}$  was similar for primary and secondary events, at 69 ms and 67 ms,  
188 respectively, consistent with primary and secondary events reflecting similar motor  
189 engagement processes and differing only in their initial starting positions. In the single-



190 bead assay, the primary events had similar median durations as the three bead (62 ms),  
191 whereas the secondary events were fairly rare and were shorter duration (23 ms).

192 Because the microtubule dumbbell was pre-tensioned to reduce thermal noise,  
193 higher trap stiffnesses were used with the three-bead assay. The higher stiffness also  
194 compensated for the larger viscous drag of the dumbbell compared to a single bead,  
195 resulting in the relaxation times being similar for the two assays (see Supplemental  
196 Information and Fig. S1). As a result of this higher stiffness, the loading rate during force  
197 ramps ( $dF_x/dt = k_x \cdot v_x$ ) was faster in the three-bead assay, raising the possibility that the  
198 lower termination forces in the single-bead assay may result from the longer time required  
199 to generate high forces. To rule out this possibility, we repeated the single-bead assay at  
200 a higher trap stiffness and found that, although  $F_{\text{term}}$  increased slightly, it was still  
201 substantially lower than the value for the three-bead assay (Fig. S2A). Furthermore, using  
202 a more comparable trap stiffness in the single-bead assay, the median engagement time  
203 fell to 35 ms, highlighting shorter engagement times in the single-bead assay (Fig. S2B).  
204 Therefore, termination forces were higher in the three-bead assay than in the single-bead  
205 assay, consistent with the vertical forces inherent in the single-bead assay limiting the  
206 duration of the force ramps.

207

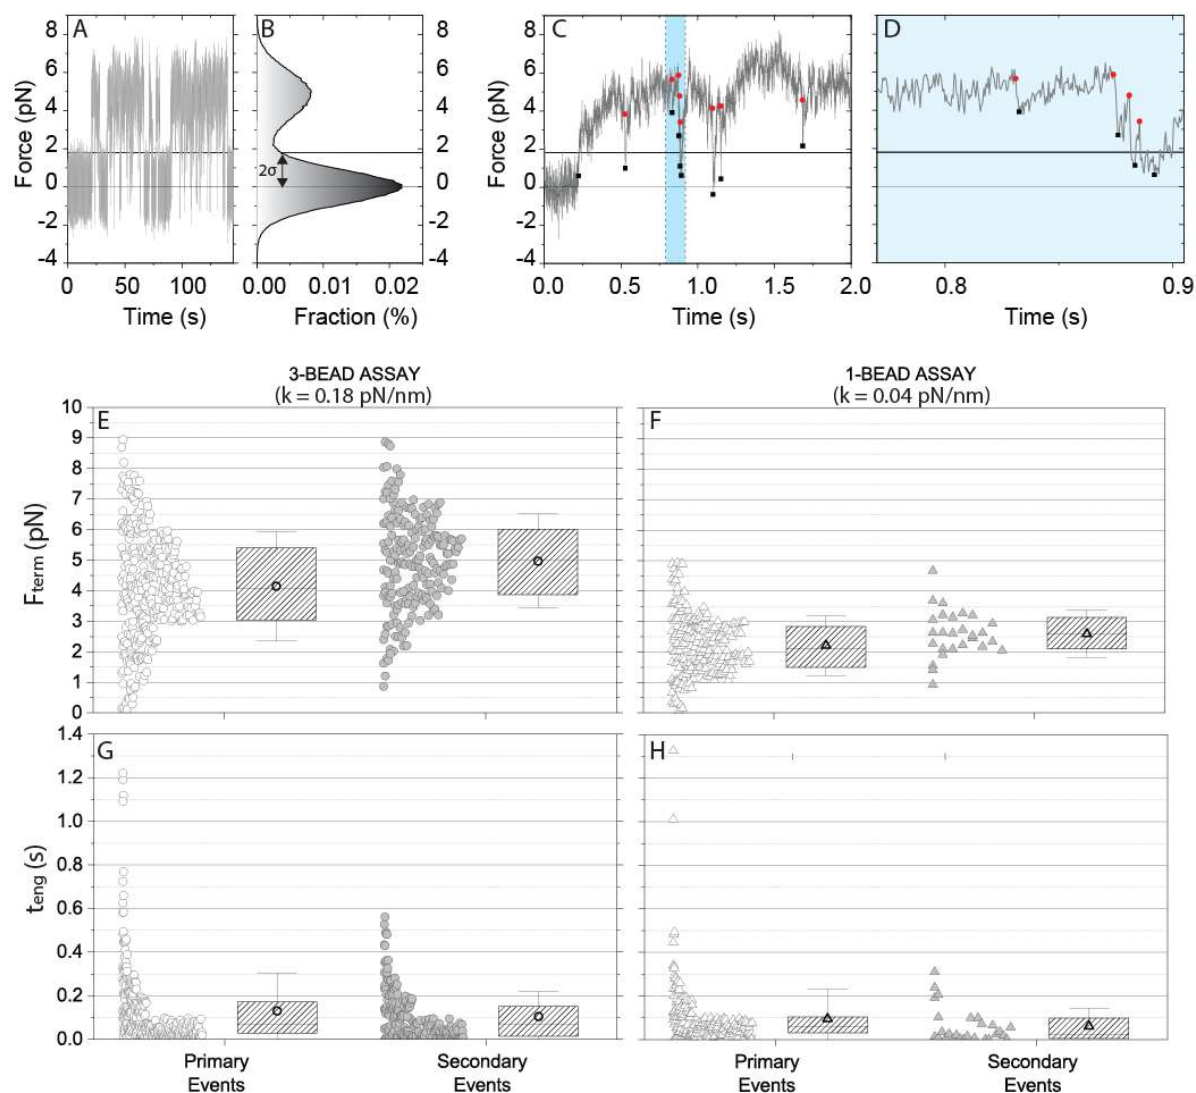

208

209 **Figure 2: Quantification of KIF1A primary and secondary force ramps.**  
 210 (A) Long duration force trace of KIF1A in the three-bead assay. (B) Corresponding  
 211 stationary distribution of force, exhibiting a peak at the zero-force equilibrium position and  
 212 a ramp force peak at 5 pN. Primary events are defined as force ramps that start within  
 213 two standard deviations of the zero-force baseline (horizontal  $2\sigma$  line at  $F = 1.8$  pN). (C)  
 214 Sample force trace in the three-bead assay showing multiple disengagement events (red  
 215 dots) and reengagement events (black squares). Reengagements that initiate below the  
 216  $2\sigma$  line are considered primary binding events, whereas events that start above the  
 217 threshold are considered secondary events. (D) Expanded view of highlighted portion of  
 218 (C). (E and F): KIF1A termination forces,  $F_{\text{term}}$  for primary and secondary events in the  
 219 (E) three-bead and (F) single-bead assays. In each case, raw data are shown at left and  
 220 the average (open circle and triangle), median (horizontal line), quartile (boxes) and  
 221 standard deviation (error bars) shown at right. (G and H): Engagement durations,  $t_{\text{eng}}$   
 222 for primary and secondary events in the (G) single-bead and (H) three-bead assay. Raw

223 data are shown at left and the mean (open circles and triangles), quartile (shaded box)  
224 and standard deviation (error bars) are shown at right.

225

226 ***KIF1A engagement times are short under load and reengagement occurs within***  
227 ***milliseconds.***

228 A consistent feature of KIF1A behavior in both the single- and three-bead assays  
229 was the rapid reengagement of the motor with the microtubule following the termination  
230 of a force ramp. This behavior was observed previously in a single-bead study (13), but  
231 not quantified. To characterize this reengagement behavior, we determined the restart  
232 time,  $t_{\text{restart}}$ , defined as the time between termination of one force ramp and initiation of  
233 the next. For KIF1A and KIF5B in the two optical trapping geometries, the cumulative  
234 probability distribution of restart times showed a population of fast restart events on the  
235 ms timescale and two slower populations with time constants  $> 100$  ms (Fig. 3A and B).  
236 The cumulative distributions of  $t_{\text{restart}}$  were fitted to the sum of three exponentially  
237 distributed populations. In the three-bead assay, the time constant of the fastest phase  
238 was 0.89 ms for KIF1A and 2.5 ms for KIF5B (Table 1), which are on the order of the  
239 dead time of the experiment set by the relaxation time of the trapped beads (see  
240 Methods). Strikingly, 79% of KIF1A reengagement events occur within the fast phase,  
241 compared with only 25% of KIF5B reengagements (Table 1). For both motors, the  
242 amplitude of the fast phase is smaller for the single bead assay (Table 1), suggesting that  
243 the assay geometry significantly impacts the reengagement times (Fig. 3B). The slower  
244 phases are likely due to motors detaching from the microtubule with reengagement being  
245 limited by the steric constraints of the experimental geometry and the motor kinetics.

246 To compare the ability of the two motors to generate and sustain forces against  
247 hindering loads oriented exclusively parallel to the microtubule, we compared the average  
248  $F_{\text{term}}$  and median  $t_{\text{eng}}$  in the three-bead assay. As shown in Fig. 3C,  $\langle F_{\text{term}} \rangle$  was  $\sim 6$  pN  
249 for KIF5B, but was only  $\sim 4$  pN for KIF1A. This reduced capacity of KIF1A to generate and  
250 sustain forces was also seen in the single-bead assay (Fig. 3D). Therefore, even though  
251 KIF5B steps at less than half the speed of KIF1A and thus takes longer time to generate  
252 large forces, the KIF5B force ramps terminate at higher forces. Consistent with these  
253 higher forces, the median engagement time during force ramps in the three-bead assay

254 was more than an order of magnitude shorter for KIF1A than for KIF5B (Fig. 3E), and  
255 shorter engagement times for KIF1A were also seen in the single-bead assay (Fig. 3F).  
256 In summary, KIF1A disengages from the microtubule under load more readily than KIF5B,  
257 and consequently only ~15% of KIF1A ramps reach 6 pN, whereas ~50% of KIF5B ramps  
258 reach and exceed 6 pN (Fig. S3).

259

260 Table 1: Fitting results of cumulative probability of reengagement using a tri-exponential function

|                    | $A_1$ (%)     | $\tau_1$ (s)           | $A_2$ (%)     | $\tau_2$ (s)     | $A_3$ (%)      | $\tau_3$ (s)    |
|--------------------|---------------|------------------------|---------------|------------------|----------------|-----------------|
| <b>KIF1A-1B</b>    | $34 \pm 1.4$  | $0.0019 \pm 0.00022$   | $32 \pm 1.3$  | $0.15 \pm 0.015$ | $34 \pm 1.0$   | $7.2 \pm 0.43$  |
| <b>KIF1A-3B</b>    | $79 \pm 1.9$  | $0.00089 \pm 0.000040$ | $17 \pm 0.90$ | $0.20 \pm 0.019$ | $5.0 \pm 0.82$ | $2.0 \pm 0.53$  |
| <b>KIF5B-1B</b>    | $14 \pm 0.46$ | $0.0017 \pm 0.0020$    | $50 \pm 1.2$  | $0.96 \pm 0.033$ | $37 \pm 1.0$   | $9.3 \pm 0.37$  |
| <b>KIF5B-3B</b>    | $25 \pm 0.68$ | $0.0025 \pm 0.00019$   | $26 \pm 0.43$ | $0.17 \pm 0.012$ | $49 \pm 1.1$   | $1.3 \pm 0.030$ |
| <b>KIF1A-SW-3B</b> | $66 \pm 1.9$  | $0.0011 \pm 0.000065$  | $14 \pm 1.1$  | $0.14 \pm 0.020$ | $19 \pm 1.1$   | $1.2 \pm 0.084$ |

261 The relative amplitudes  $A_i$ , the characteristic times  $\tau_i$  and the errors are calculated from the 95%  
262 confidence intervals of each fitting parameter (see Materials and Methods). Error-weighted fits were  
263 performed using bootstrap errors (27).

264

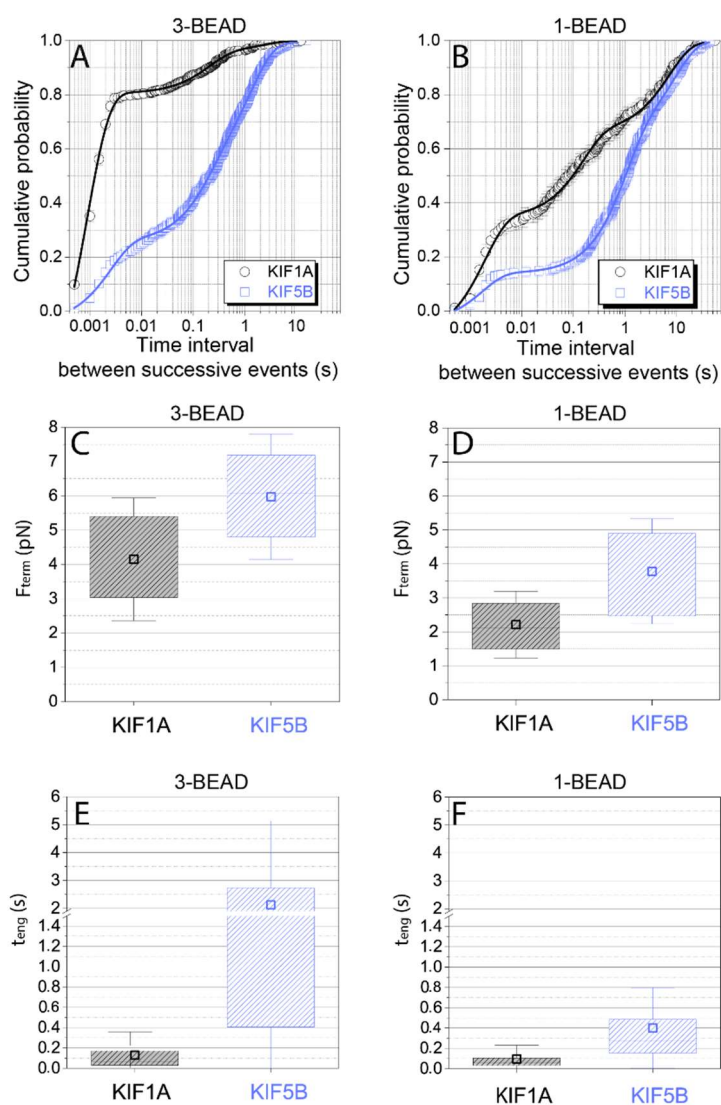

265

266 **Figure 3: Comparison of KIF1A and KIF5B engagement/disengagement dynamics.**  
267 (A and B): Cumulative probability distribution of time intervals between successive force  
268 ramps ( $t_{\text{restart}}$ ) for KIF1A and KIF5B in the (A) three-bead and (B) single-bead assays.  
269 Data include both primary and secondary events. Error bars are calculated using the  
270 bootstrap method (27), and solid lines represent fitting to a three-exponential function with  
271 offset (see Materials and Methods). (C and D): Comparison of KIF1A and KIF5B  
272 termination forces,  $F_{\text{term}}$  for primary events in the (C) three-bead and (D) single-bead  
273 assays. Data are presented as mean (open squares), median (horizontal line), quartiles  
274 (shaded boxes), and standard deviation (error bars). (E and F): Comparison of KIF1A and  
275 KIF5B engagement durations,  $t_{\text{eng}}$  for primary events in the (E) three-bead and (F)  
276 single-bead assays. Note the break introduced at 1.5 s in the y-axis due the large difference  
277 between the median values of  $t_{\text{eng}}$  between KIF1A (0.069 s) and KIF5B (1.1 s) in the  
278 three-bead assay.

279

280 ***The KIF1A loop-12 contributes to superprocessivity but does not enhance initial***  
281 ***landing on microtubules.***

282 A distinctive feature of the KIF1A motor domain is a loop-12 insert containing six  
283 positively charged lysines that are thought to interact electrostatically with the negatively  
284 charged C-terminal tail of tubulin (5, 6) (Fig. 1A). To test the contribution of loop-12 to the  
285 microtubule engagement duration and superprocessivity of KIF1A at near physiological  
286 ionic strength, we made a loop swap mutant, KIF1A-SW, by exchanging the native KIF1A  
287 loop-12 that contains the six lysines for loop-12 from *Drosophila* kinesin-1, which contains  
288 only one lysine (Fig. 1A). Single-molecule TIRF experiments in 80 mM PIPES buffer  
289 showed that in the absence of external forces, KIF1A and KIF1A-SW move along surface  
290 immobilized microtubules at similar average speeds  $\langle V \rangle$  of  $1.2 \pm 0.36 \mu\text{m/s}$  and  $1.3 \pm$   
291  $0.42 \mu\text{m/s}$ , respectively (Fig. 4A-C; Table S3). Notably, the average run length  $\langle RL \rangle$  of  
292 KIF1A-SW ( $1.1 \pm 0.56 \mu\text{m}$ ) was approximately six-fold lower than for KIF1A ( $6.3 \pm 4.2$   
293  $\mu\text{m}$ ) (Fig. 4D; Table S3).

294 Previous studies that used a loop-swap construct found that swapping the lysine  
295 containing region of loop-12 of KIF1A had minimal effect on the run length at low ionic  
296 strength (12 mM PIPES buffer), although it did enhance the landing rate of KIF1A (8). To  
297 resolve this discrepancy, we carried out single-molecule experiments in 12 mM PIPES  
298 buffer and found that the run lengths of KIF1A and KIF1A-SW were similar to one another,  
299 consistent with the previous studies (Fig. S6). Thus, we conclude that at near-  
300 physiological ionic strength, positive charge in loop-12 contributes to the KIF1A run  
301 length, but at low ionic strength the loop swap has a negligible effect on the run length.

302 In contrast to the different run lengths, we found that KIF1A and KIF1A-SW had  
303 similar single-molecule microtubule landing rates in 80 mM PIPES, which were  $0.055 \pm$   
304  $0.011 \text{ s}^{-1} \cdot \mu\text{M}^{-1} \cdot \mu\text{m}^{-1}$  and  $0.087 \pm 0.026 \text{ s}^{-1} \cdot \mu\text{M}^{-1} \cdot \mu\text{m}^{-1}$ , respectively (mean  $\pm$  95% confidence  
305 interval; Fig. 4E). Because this single-molecule landing rate method is highly sensitive to  
306 differences in relative activity between different motor preps, we performed  
307 complementary stopped-flow experiments to determine the apparent second-order rate  
308 constant for microtubule binding. In this assay, KIF1A motors preincubated with mantADP

309 are rapidly mixed with a range of microtubule concentrations in the presence 1 mM ATP.  
310 Microtubule binding to KIF1A in the presence of excess ATP results in irreversible  
311 mantADP release, resulting in a decrease in mant fluorescence. Consistent with the  
312 single-molecule landing rates in 80 mM PIPES, the bimolecular on-rates of KIF1A ( $10.6$   
313  $\pm 0.5 \mu\text{M}^{-1}\text{s}^{-1}$ ) and KIF1A-SW ( $9.6 \pm 1.5 \mu\text{M}^{-1}\text{s}^{-1}$ ) were similar (Fig. 4F).

314 To further investigate the interaction of the KIF1A loop-12 with microtubules, we  
315 removed the negatively charged C-terminal tail of tubulin by subtilisin proteolysis  
316 (Materials and Methods; Fig. S4). We found that the average speed of KIF1A on subtilisin  
317 microtubules was unaffected ( $1.3 \pm 0.39 \mu\text{m/s}$ ; Table S3), but the average run length was  
318 decreased by  $\sim 5$ -fold to  $1.3 \mu\text{m}$  (Fig. S5; Table S3). Thus, decreasing the charge of the  
319 KIF1A loop-12 or cleaving the C-terminal tubulin tail had similar effects, implicating  
320 electrostatic interactions between these regions as an important contributor to the  
321 superprocessivity of KIF1A under zero load. In summary, at the near-physiological ionic  
322 strength used in this study, the highly-charged loop-12 is necessary for the unloaded  
323 superprocessivity of KIF1A, but it is not required for the initial strong-binding of KIF1A to  
324 microtubules.

325

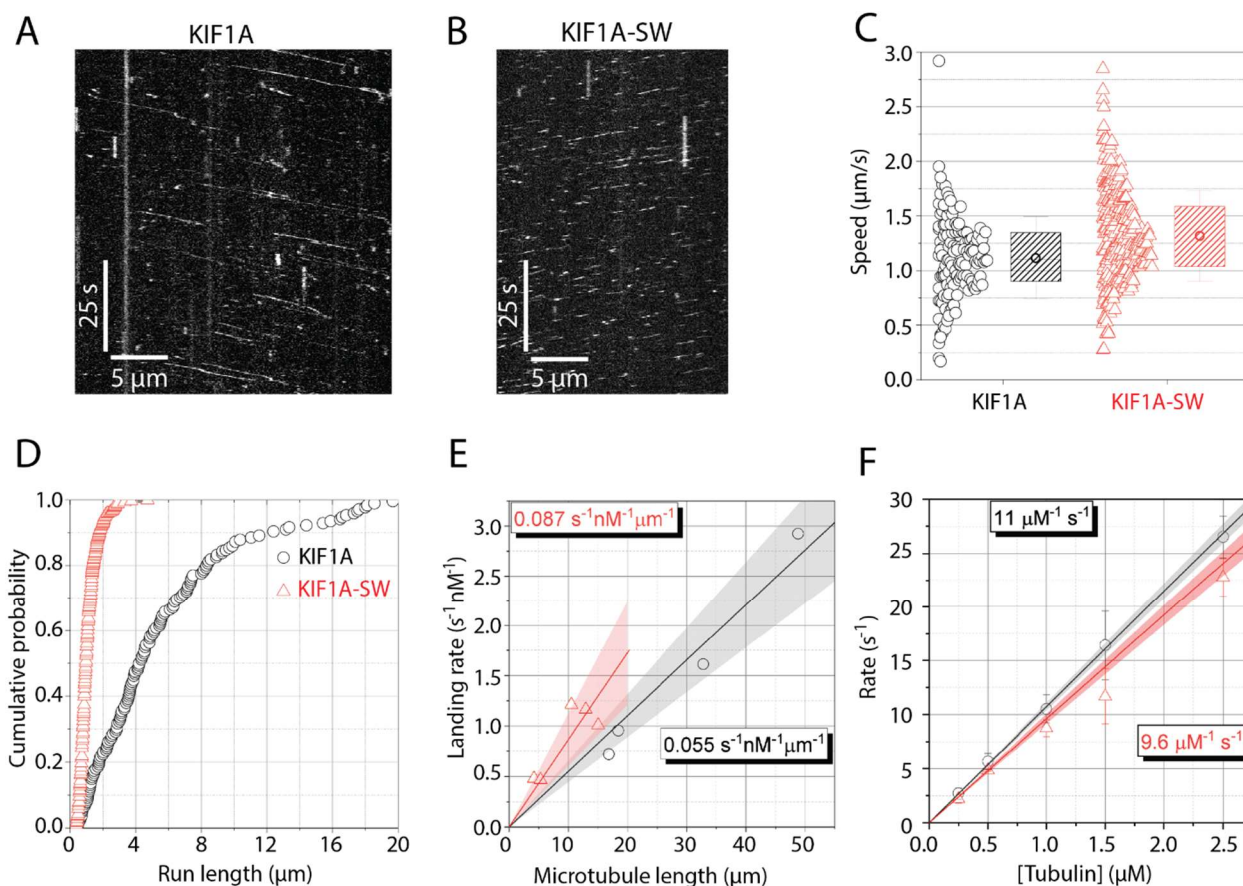

326

327 **Figure 4: Influence of loop-12 on KIF1A performance under zero load.**

328 (A and B) Kymographs from single-molecule TIRF assays of (A) KIF1A and (B) KIF1A-  
 329 SW on control microtubules in 2 mM ATP. (C) Comparison of single-molecule speeds  
 330 between KIF1A (black circles) and KIF1A-SW (red triangles), showing raw data at left and  
 331 mean (open symbols), median (horizontal line), quartile (shaded box) and standard  
 332 deviation (error bar) at right. (D) Cumulative probability distribution of KIF1A and KIF1A-  
 333 SW run lengths, using the same symbols and colors as in (C). (E) Plot of the single-  
 334 molecule landing rate ( $\text{s}^{-1} \cdot \text{nM}^{-1}$ ) for KIF1A (black circles) and KIF1A-SW (red triangles) as  
 335 a function of the microtubule length ( $\mu\text{m}$ ). The solid lines are linear fits, which correspond  
 336 to the landing rates ( $\text{s}^{-1} \cdot \text{nM}^{-1} \cdot \mu\text{m}^{-1}$ ) for each motor. Shaded areas represent the 95%  
 337 confidence bands of the linear fits. (F) Plot of the mantADP release rate upon mixing  
 338 mantADP bound motors with different concentrations of taxol-stabilized microtubules by  
 339 stopped-flow. The linear fits to the data represent the bimolecular on-rate for KIF1A  
 340 binding to microtubules ( $\mu\text{M}^{-1} \cdot \text{s}^{-1}$ ). Shaded areas represent the 95% confidence bands of  
 341 the linear fits.

342



343 ***Both the loop-12 and the nucleotide state of the microtubule affect the load-***  
344 ***dependent properties of KIF1A***

345         Given the importance of loop-12 for the unloaded processivity of KIF1A at near-  
346 physiological ionic strength, we investigated the motile properties of KIF1A-SW under  
347 load. In the three-bead assay the median motor engagement duration, median- $t_{\text{eng}}$ ,  
348 decreased from 0.069 s for KIF1A to 0.039 s for KIF1A-SW (Man Whitney test  $p < 0.001$ ).  
349 Consistent with these shorter engagement times, the mean termination force,  $\langle F_{\text{term}} \rangle$ ,  
350 decreased from 4.1 pN for KIF1A to 3.5 pN for KIF1A-SW (Fig. 5; Table II). To determine  
351 if these lower termination forces were caused by differences in the motor stepping rate  
352 under load, force-velocity profiles were compared for KIF1A and KIF1A-SW and found to  
353 be similar (Supplementary Information; Fig. S7). This similarity indicates that the lower  
354 mean termination force is a consequence of the shorter engagement duration. Taken  
355 together, when loop-12 was substituted, KIF1A disengaged from the strong-binding state  
356 more readily under load. Interestingly, when subtilisin-treated microtubules were used in  
357 the three-bead assay to determine whether removal of the highly negatively charged C-  
358 terminal tail of tubulin (E-hook) produced a similar effect, we found that there was a large  
359 variability in the attachment duration for different microtubule dumbbells (Fig. S8).  
360 Although it is unclear whether this variability is due to absence of the E-hooks, nonspecific  
361 cleavage of other regions of tubulin, or some other effect, we would like to draw caution  
362 to the use of subtilisin-treated microtubules, especially in loaded assays. Comparison with  
363 recombinant tubulin lacking C-terminal tails should elucidate this aspect in the future.

364         To investigate whether loop-12 of KIF1A contributes to the motor's ability to rapidly  
365 reengage following termination of a force ramp, we quantified the time before  
366 reengagement,  $t_{\text{restart}}$  for the loop swap mutant. We found that 79% of KIF1A events  
367 reengaged within 2 ms of disengagement, compared with only 66% of KIF1A-SW events  
368 (Fig. 5C). Coupled with the lack of effect on the unloaded landing rate (Fig. 4 E and F),  
369 positive charge in loop-12 does not significantly contribute to the initial interaction of the  
370 motor with the microtubule from solution, and it plays only a minor role in the fast  
371 reengagement with the microtubule following termination of a force ramp (Fig. 5C).

372         Our final investigation into the mechanism of fast reengagement kinetics of KIF1A  
373 asked whether properties of the microtubule lattice affect the KIF1A reengagement

374 kinetics. Thus, instead of using taxol-stabilized GDP microtubules in the three-bead  
375 assay, we used microtubules polymerized with GMPCPP which have an expanded  
376 microtubule lattice (28-31). The distributions of termination forces and engagement times  
377 were not substantially impacted for either KIF1A or KIF1A-SW on GMPCPP microtubules  
378 (Fig. 5A and B; Table S2), suggesting that the dissociation rate of KIF1A under load is  
379 not affected by the nucleotide state of the microtubule. However, the probability of  
380 restarting within 2 ms increased on GMPCPP microtubules relative to Taxol/GDP  
381 microtubules (Fig. 5C and D). Strikingly, differences between the KIF1A and KIF1A-SW  
382 restart times that were observed on Taxol/GDP microtubules were abolished on  
383 GMPCPP microtubules. Shorter restart times on GMPCPP microtubules were also  
384 observed for KIF5B (Fig. S9). Thus, the rate of reengagement with the microtubule under  
385 load is affected by i) the identity of the motor, ii) the presence of the loop-12, and iii) the  
386 nucleotide state of the microtubule lattice.

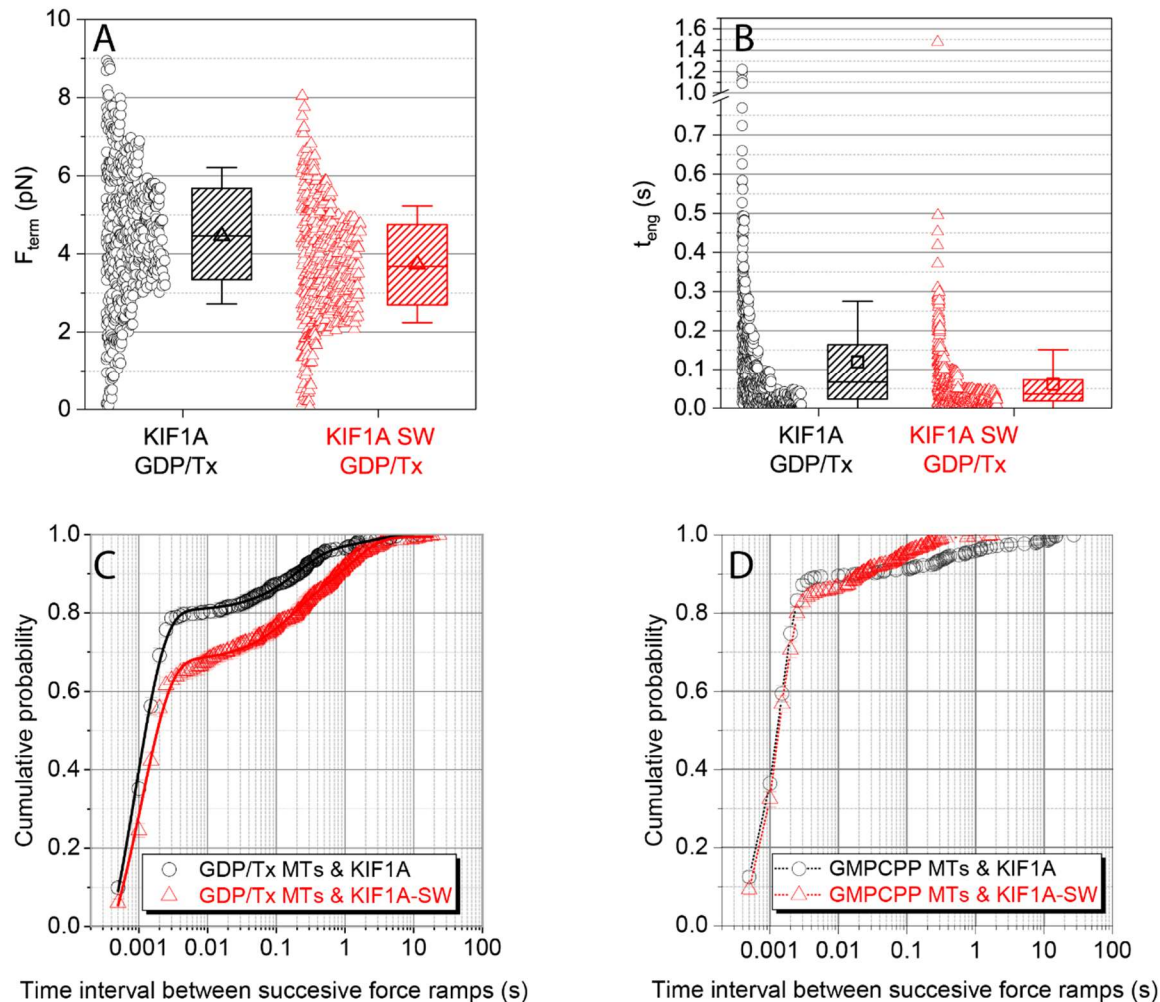

387

Time interval between successive force ramps (s)

Time interval between successive force ramps (s)

388 **Figure 5: Influence of loop-12 and microtubule lattice on KIF1A performance under**  
 389 **load.**

390 A) Comparison of KIF1A and KIF1A-SW termination forces,  $F_{\text{term}}$  for primary events on  
 391 taxol-stabilized microtubules. (B) Comparison of KIF1A and KIF1A-SW engagement  
 392 times,  $t_{\text{eng}}$  for primary events on taxol-stabilized microtubules. (C and D): Cumulative  
 393 probability distribution of time intervals between successive force ramps,  $t_{\text{restart}}$  for KIF1A  
 394 (open circles) and KIF1A-SW (open triangles) on (C) taxol-stabilized and (D) GMPCPP-  
 395 stabilized microtubules. Data include both primary and secondary events. Error bars  
 396 are calculated using the bootstrap method (27), the solid lines in (C) represent fitting to three-  
 397 exponential decay function (see Materials and Methods; Table I) and the dotted lines in  
 398 (D) are just linear connections between the data points to serve as guide to the eye.

399

## 400 **Discussion**

401           The ability of kinesin motors to power intracellular transport against mechanical  
402 loads is integral to their function. The influence of load on motor speed and microtubule  
403 attachment lifetimes has been characterized using optical tweezers for a number of  
404 kinesin isoforms (e.g., (17, 32-34)). However, little is known about the load-dependence  
405 of kinesin-3 motility, which is of particular interest given its superprocessive behavior  
406 under zero load. Here, we find that KIF1A processive runs are readily terminated under  
407 load, resulting in lower average termination forces as compared to KIF5B. However, this  
408 behavior is compensated for by a rapid reengagement of the motor and recovery of force  
409 which is particularly apparent in the three-bead assay. These rapid KIF1A reengagement  
410 kinetics, also observed in a recent single-bead trap study (13, 35), are consistent with the  
411 fast bimolecular association rate constant for microtubule binding reported in a recent  
412 biochemical study (14). KIF1A therefore represents a different paradigm than KIF5B for  
413 an efficient transporter under force by rapidly and repeatedly reengaging with the  
414 microtubule and restarting its processive motion. Thus, whereas KIF1A is  
415 superprocessive in the absence of load, under load it may be better characterized as  
416 super-engaging.

417

### 418 ***Performance of KIF1A under load.***

419           By implementing the three-bead assay in a dual-beam optical tweezers setup, we  
420 were able to investigate the performance of KIF1A as it stepped against loads oriented  
421 primarily parallel to the microtubule long axis. Importantly, we found that that KIF1A  
422 forces, although somewhat smaller on average, are comparable to those generated by  
423 KIF5B. KIF1A did not generate long-lived ( $> 0.2$  s) force plateaus, or “stalls” seen  
424 frequently with KIF5B in the three-bead assay (19); instead, KIF1A more often  
425 disengaged before reaching a plateau. Thus, instead of quantifying a “stall force”, we  
426 quantified the termination force,  $F_{\text{term}}$ , of the force ramps and found that in both the single-  
427 and three-bead assays,  $\langle F_{\text{term}} \rangle$  was smaller for KIF1A than for KIF5B. The lower KIF1A  
428 termination forces reflect the inability of KIF1A to remain strongly engaged with the

429 microtubule under load, which may be a useful adaptation to achieve bidirectional motion  
430 (discussed below). Interestingly, the engagement times and termination forces for both  
431 KIF1A and KIF5B are smaller in the single-bead rather than in the three-bead assay,  
432 which demonstrates that vertical loads accelerate disengagement of these kinesin  
433 isoforms from the microtubule.

434

#### 435 ***Mechanism of fast KIF1A reengagement.***

436 A distinct feature of KIF1A motor behavior is its fast reengagement with the  
437 microtubule following the termination of a force ramp. Almost 79% of reengagements for  
438 KIF1A in the three-bead assay occurred within 2 ms whereas only 20% for KIF5B (Fig.  
439 3B). Consensus models for the kinesin chemomechanical cycle point to the motor being  
440 in a weak-binding ADP-P<sub>i</sub> or ADP state at the termination of the force ramp, and the  
441 transition to the strong-binding state to start the next force ramp requiring ADP release to  
442 generate the tight-binding apo state (36). Furthermore, two recent kinesin-1 optical  
443 trapping studies characterized the fast unbinding and rebinding events that occur while  
444 kinesin-1 slips backwards after it approaches its stall force (24, 25). Toleikis et al. found  
445 that during stall plateaus the bead slipped backward in 8 nm and longer displacements  
446 (24). Dwell times preceding backward displacements were longer than those preceding  
447 forward steps, consistent with the motor releasing P<sub>i</sub> and slipping backwards in the ADP  
448 state. Using a small, high refractive index bead, Sudhakar et al found that during the  
449 backslipping process, the bead paused transiently (~30 μs) at 8 nm increments,  
450 consistent with the motor interacting transiently with successive tubulin subunits as it slid  
451 backwards along the protofilament (25). Both studies concluded that under load, kinesin-  
452 1 can enter a weakly-bound ADP or ADP-P<sub>i</sub> state and slip backwards along the  
453 microtubule, and then reengage and recover. The drag coefficient of the microtubule  
454 dumbbell in our three-bead assay masks detection of microsecond interactions between  
455 KIF1A and the microtubule during the backward displacements. However, the  
456 millisecond-scale rescue of processive motion that we observe is consistent with KIF1A

457 entering a weak-binding slip state like KIF5B, but transitioning back to a strong-binding,  
458 force-generating state much faster than KIF5B.

459 To explore the kinetics of this reengagement process, we constructed a kinetic  
460 model and fit it to our normalized cumulative distributions of restart times for KIF1A,  
461 KIF1A-SW, and KIF5B. In the model, the motor starts in a weakly-bound *Disengaged*  
462 state. The motor can then either transition to an *Engaged* state and continue to step  
463 against the load, or it can dissociate and enter a *Detached* state. Our experimental  $t_{\text{restart}}$   
464 times correspond to the time it takes to transition from the *Disengaged* state to the  
465 *Engaged* state. To account for the two slower time constants in the  $t_{\text{restart}}$  distributions, we  
466 included two *Detached* states, with the idea that transitions into and out of these detached  
467 states may be influenced by the bead geometry and other experimental uncertainties.  
468 Note that in the model, the rate of the fast reengagement population as well as the relative  
469 proportion of fast reengagement events are determined by a kinetic race between the  
470 engagement rate constant,  $k_e$ , and the two detachment rate constants,  $k_{+d1}$  and  $k_{+d2}$ .

471

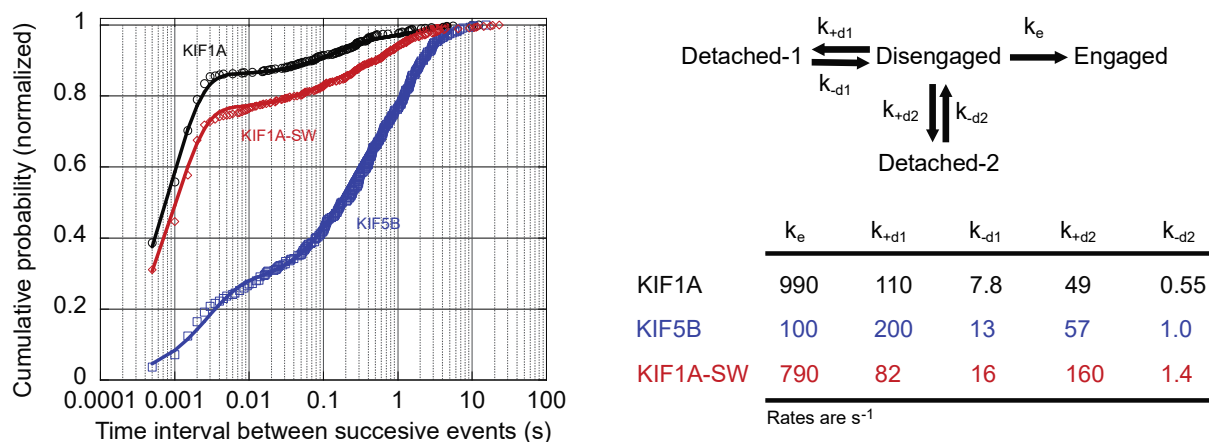

472

473 **Figure 6: Comparison of reengagement rates between KIF1A and KIF5B.**

474 (A): Cumulative probability distribution of time intervals between successive force ramps,  
475  $t_{\text{restart}}$  for KIF1A (red open circles), KIF1A-SW (blue open triangles), and KIF5B (green  
476 open squares) on taxol-stabilized microtubules. Data are offset to account for missed  
477 events resulting from the 0.5 ms minimum detection limit. Solid lines are fits to model of  
478 reengagement kinetics. (B): Kinetic model of motor reengagement. Following termination  
479 of a force ramp, the motor is in a *Disengaged* state. The motor can then reengage with  
480 the microtubule, with rate  $k_e$ , or it can detach from the microtubule with two different rates

481  $k_{+d1}$  and  $k_{+d2}$  that depend on the motor-microtubule geometry and other factors. From the  
482 detached state, the motor can return to the disengaged state with rates  $k_{-d1}$  and  $k_{-d2}$  and  
483 reengage with the microtubule. Table shows the fits of the kinetic model to the  $t_{\text{restart}}$  times  
484 for the three motors.  
485

486 When we fit the model to the experimental data, the KIF5B reengagement rate  $k_e$   
487 was  $100 \text{ s}^{-1}$ , whereas the KIF1A reengagement rate was  $990 \text{ s}^{-1}$ . Transition into the  
488 strongly-bound state is thought to be limited by ADP release (36). Published values for  
489 the ADP release rate of KIF5B in the absence of external loads range from  $110 \text{ s}^{-1}$  to  $306$   
490  $\text{s}^{-1}$  (37-40), which is close to the estimated  $k_e$  from our model (Fig. 6). However, the  
491 estimated value of  $k_e$  for KIF1A is more than twice the reported rate of  $\sim 350 \text{ s}^{-1}$  for the  
492 ADP release when KIF1A is bound to the microtubule in a one-headed state in the  
493 absence of external load (14). How can we account for this fast KIF1A reengagement  
494 rate? One possibility is that this transition is load dependent, such that rearward load on  
495 the motor when it engages with the microtubule accelerates ADP release and thus the  
496 transition to a strong-binding state. Another consideration is that in the three-bead assay,  
497 the microtubule is under tensile forces even in the absence of interactions with kinesin;  
498 these tensile forces could alter the microtubule lattice in a way that enhances KIF1A  
499 engagement kinetics and/or ADP release. A third possibility is that KIF1A disengages in  
500 a nucleotide-free strong-binding state and is able to rapidly reengage without needing to  
501 release ADP or undergo the subsequent weak-to-strong transition. Additional  
502 experiments will be required to distinguish among these possibilities.  
503

#### 504 ***The role of the loop-12 in KIF1A motility.***

505 A distinctive feature of the KIF1A sequence is the positively charged K-loop insert  
506 of loop-12, but the role of this region in KIF1A motility under load remains murky. The  
507 importance of electrostatic interactions mediated by this loop was established in work on  
508 recombinant KIF1A monomers where it was shown that diffusive tethering by the K-loop  
509 enabled processivity (5, 6). In later work, KIF1A dimers were shown to be  
510 superprocessive at low ionic strengths (12 mM PIPES) (7, 8). As part of this work, it was  
511 shown that replacing the lysines in loop-12 of KIF1A with the analogous sequence from  
512 kinesin-1 (KIF5C) did not abolish the superprocessivity at low ionic strength, but it

513 decreased the microtubule landing rate. We find here that in 80 mM PIPES buffer, which  
514 approaches physiological ionic strength, substituting the KIF1A loop-12 with that of  
515 *Drosophila* kinesin-1 decreases the unloaded run length six-fold, and deleting the C-  
516 terminal tail of tubulin has a similar effect. We propose that previous work (8) did not  
517 observe a change in run length due to the use of a very low ionic strength buffer.  
518 Consistent with this result, we found that KIF1A and KIF1A-SW had similar run lengths to  
519 each other in 12 mM PIPES buffer (Fig. S6).

520 We found that swapping the kinesin-1 loop-12 into KIF1A had only minor effects  
521 on the ability of KIF1A to remain engaged with the microtubule under load. For instance,  
522 in the three-bead assay, swapping loop-12 reduced  $F_{\text{term}}$  by ~25% and  $t_{\text{eng}}$  by ~2-fold.  
523 Importantly, the loop-12 swap only marginally affected the initial landing rate of the motor  
524 on the microtubule at the near-physiological ionic strength (80 mM PIPES) in the absence  
525 of load, as assessed by the single-molecule landing rate in TIRF and the bimolecular on-  
526 rate measured by stopped flow. Thus, when a motor in solution first encounters a  
527 microtubule, transition to the strong-binding state and ADP release is mediated by  
528 interaction of the canonical microtubule binding site (41) with the microtubule, rather than  
529 through initial formation of a tethered intermediate that is stabilized by the K-loop.

530 In the three-bead assay the fraction of reengagement events that occurred within  
531 2 ms decreased by only ~25% for KIF1A-SW. This result is broadly consistent with the  
532 lack of an effect of the K-loop on the landing rate from solution. Intriguingly, when we  
533 quantified reengagement kinetics on microtubules polymerized in GMPCPP, which have  
534 been shown to have expanded lattices compared to Taxol/GDP microtubules (28, 30, 31),  
535 the proportion of rapid reengagement events increased for KIF1A-SW and matched that  
536 of wild-type. This result suggests that interaction of KIF1A with the microtubule under load  
537 are affected, albeit minimally, by both changes in charge in loop-12, as well as differences  
538 in the microtubule lattice. A recent study examining delivery of vesicles to synaptic  
539 boutons found that KIF1A has a lower affinity for GMPCPP microtubules compared to  
540 GDP/taxol microtubules (42). That reduced affinity was not observed in our  
541 measurements, but there are a number of differences between the assays, most notably  
542 load and concentrations of motors (single molecule vs saturating).

543



## 544 ***Optical Trapping Geometry***

545       Recent experimental (19) and theoretical (18) studies revealed the impact of  
546 optical trapping geometry on the measured parameters of KIF5B motility. Importantly,  
547 KIF5B stall times have likely been underestimated in the literature due to the vertical force  
548 components inherent to the assay. Additionally, the accelerated detachments in the  
549 single-bead assay have masked microtubule-to-microtubule heterogeneity in stall times.  
550 Thus, it was important to evaluate the KIF1A motility with both the single- and three-bead  
551 optical trapping assays. Like KIF5B, we observed larger  $t_{\text{eng}}$  and  $F_{\text{term}}$  values for KIF1A  
552 using the three-bead geometry, but the microtubule-microtubule variability was not seen.  
553 Most striking was the > 2-fold increase in the fraction of the reengagement events  
554 observed in the three-bead assay. By using the three-bead assay, we revealed that ~80%  
555 of all KIF1A detachments are followed by reengagement within 2 ms, compared to ~34%  
556 in the single-bead assay. These results have important implications for understanding the  
557 unique mechanism by which KIF1A sustains motility in the presence of obstacles and  
558 resisting mechanical loads.

559

## 560 ***Insights into the biological function of KIF1A***

561       The principal role of KIF1A in cells is vesicle transport and, unlike KIF5A, which  
562 transports cargo exclusively in axons, KIF1A transports cargo in both axons and dendrites  
563 (43-45). Much of this transport is bidirectional (46), meaning that KIF1A must both  
564 navigate diverse microtubule substrates, but also transport cargo against hindering loads  
565 generated by dynein. Although KIF1A has been characterized as a superprocessive  
566 motor in the absence of load, it is clear from Budaitis et al. (13) and our work that  
567 mechanical load more easily ends these processive runs, compared to KIF5B.

568       Interestingly, KIF1A has evolved kinetic features that allow it to be super-engaging.  
569 First, KIF1A has a 10-fold faster bimolecular on-rate, compared to kinesin-1 in the  
570 absence of load (14, 47). This fast on-rate is not mediated by the highly charged K-loop,  
571 but rather by other structural and mechanochemical features of the catalytic domain (15).  
572 Second, KIF1A has a very high probability of entering a strongly-bound state capable of  
573 initiating processive motility within 2 ms of disengaging from the microtubule under load.  
574 During intracellular transport, these features confer a distinct advantage because they

575 increase the probability a motor will rebind to the microtubule to reinitiate transport  
576 following disengagement. This reengagement may allow for more robust transport  
577 because motors that disengage will rapidly resume motion along the original or a  
578 neighboring microtubule, testing for the best path to achieve movement. These  
579 adaptations of KIF1A mechanochemistry facilitate bidirectional transport and navigation  
580 around obstacles.

581

582

## 583 **Materials and Methods**

584

### 585 ***Protein Constructs and Purification:***

586 The KIF1A-WT construct (adapted from Addgene #61665 (10)) consists of the *R.*  
587 *norvegicus* KIF1A residues 1-393, followed by a GCN4 leucine zipper for dimerization  
588 and an eGFP tag. The KIF1A-SW was modified by swapping the native loop-12 (residues  
589 288 – 308) of the KIF1A construct with the *D. melanogaster* KHC loop-12 sequence  
590 (GNKTHIPYRD). Both constructs have a C-terminal His tag and were bacterially  
591 expressed and purified by nickel gravity column chromatography, as described previously  
592 (14). The elution buffer, consisting of 20 mM phosphate buffer, 500 mM sodium chloride,  
593 500 mM imidazole, 10  $\mu$ M ATP and 5 mM DTT was supplemented with 10% glycerol  
594 before flash freezing and storing at -80 °C. Concentrations were determined using GFP  
595 absorbance at 488 nm.

596 Unlabeled porcine tubulin and its labeled analogues, (TRITC and biotin), GTP and  
597 Paclitaxel were purchased from Cytoskeleton, Inc. Mouse monoclonal anti-6xHis tag  
598 antibody and rat tubulin antibody which recognizes the C-terminal tail of  $\alpha$  tubulin were  
599 purchased by ABCAM. GMPCPP was purchased from Jena Biosciences, Germany.  
600 Streptavidin coated polystyrene beads 1% w/v (0.82  $\mu$ m in diameter) and silica  
601 microspheres 9,92 % solid w/v (5.0  $\mu$ m in diameter) were purchased from Spherotech,  
602 (Lake Forest, IL). Amyl acetate and 2% Colloidon in amyl acetate were purchased from  
603 Electron Microscopy Sciences, PA. Glass coverslips 22 x 45 x 1.5 mm were purchased  
604 from Fisher Scientific. Glucose oxidase from *Aspergillus niger*, aqueous solution of

605 catalase from bovine liver, dimethyl sulfoxide (DMSO), phenylmethylsulfonyl fluoride  
606 (PMSF), ATP, MgCl<sub>2</sub> and Subtilisin A *Bacillus licheniformis* were purchased from Sigma  
607 Aldrich. Mouse anti-tubulin b3 antibody which recognizes the C-terminal tail of  $\beta$  tubulin  
608 was purchased from Bio-Rad Laboratories.

609

### 610 ***Optical Tweezer Experiments***

611 Taxol-stabilized GDP microtubules and GMPCPP-stabilized microtubules were  
612 prepared from non-polymerized porcine tubulin as previously described (19). For the  
613 single-bead assay, 4% TRITC-tubulin was included, while for the three-bead assay 4%  
614 TRITC tubulin as well as 48% biotinylated tubulin were included.

615 For the single-bead assay, nitrocellulose-coated coverslips were assembled into  
616 flow chambers of 20  $\mu$ L volume as described previously (19), and used within 24 h of  
617 preparation. Aqueous solutions in BRB80 pH 6.9 were introduced in the chamber in the  
618 following sequence: 20  $\mu$ L of 0.05 mg/mL anti-tubulin antibody (Bio-Rad Laboratories) for  
619 5 min, 50  $\mu$ L of 2 mg/mL casein for 4 min, 4 x 25  $\mu$ L of 125 nM 4% TRITC microtubules  
620 supplemented with 2 mg/mL casein and 20 mM taxol for 4 x 1 min, wash with 100  $\mu$ L of  
621 2 mg/mL casein, and 50  $\mu$ L of final solution containing kinesin beads, 2 mM ATP, 2 mM  
622 MgCl<sub>2</sub>, 50 mM DTT, 20  $\mu$ M taxol, 5 mg/mL glucose, 1500 units/mL glucose oxidase, and  
623 0.2 units/mL catalase. The open ends of the flow chamber were sealed with vacuum  
624 grease to prevent evaporation during the experiment. To ensure single-molecule  
625 interactions concentrations of kinesin were used such that no more than one out of three  
626 kinesin-decorated beads interacted with surface immobilized microtubules.

627 For the three-bead assay, a solution of silica spherical pedestals (dia. 5.0  $\mu$ m) was  
628 dried on a coverslip, coated with nitrocellulose-film, and assembled into ~ 20  $\mu$ L flow  
629 chambers, as previously described (19). Aqueous solutions in BRB80 were introduced  
630 into the flow chamber in the following sequence: 20  $\mu$ L of 0.2 mg/mL anti-6xHis antibody  
631 (Abcam) for 5 min, 50  $\mu$ L of 2 mg/mL casein for 4 min, 50  $\mu$ L of kinesin construct ~1 nM  
632 supplemented with 2 mg/mL casein for 5 min, 100  $\mu$ L of 2 mg/mL casein wash, and 50  
633  $\mu$ L of final solution containing 5 nM 48% biotinylated-4% TRITC microtubules, 2 mM ATP,  
634 2 mM MgCl<sub>2</sub>, 50 mM DTT, 20  $\mu$ M taxol (excluded when GMPCPP microtubules were

635 used), 5 mg/mL glucose, 1500 units/mL glucose oxidase, and 0.2 units/mL catalase.  
636 Before sealing the chamber with vacuum grease, 3–4  $\mu$ L of streptavidin beads (dia. 0.82  
637 mm) diluted 1:30 in final solution without microtubules were introduced from one side of  
638 the chamber. To ensure single-molecule interactions concentrations of kinesin were used  
639 such that no more than one out of three kinesin-decorated spherical immobilized  
640 pedestals interacted with microtubule dumbbells.

641

### 642 ***Optical Tweezer Instrumentation and Data Analysis***

643 We used a custom made a dual-laser beam (1064 nm) optical trap system  
644 equipped with a 63x water objective, 1.2 numerical aperture as previously described (19).  
645 The trap stiffness (pN/nm) and the system-calibration factor (pN/V) for each trapped bead  
646 were determined in the absence of any microtubule interaction by calculating and fitting  
647 to a Lorentzian function the power spectrum of the Brownian motion of the beads in the  
648 trap. Microtubule dumbbells were subjected to stretching forces of 4-5 pN by moving the  
649 two laser beams apart. The trap stiffness of the individual laser beams for single-bead  
650 assays was 0.04–0.12 pN/nm and for three-bead assays was 0.060–0.090 pN/nm. The  
651 higher total stiffness in the three-bead assay was required to accommodate the sum of  
652 the stretching forces on the microtubule dumbbell and the forces generated by kinesin.  
653 The higher stiffness also decreases the relaxation time of the dumbbell close to the  
654 relaxation time of the bead in the single-bead assay (see Supplementary Methods). Since  
655 the laser traps are stationary, a piezoelectric stage controller was used to move the flow  
656 chamber and therefore control the relative position between single beads and surface-  
657 immobilized microtubules or between microtubule dumbbells and surface immobilized  
658 spherical pedestals. Data were digitized at a scanning rate of 2 kHz and filtered at 1 kHz  
659 using in-house software written in LabVIEW. Strictly monotonic decrease in the force  
660 trace were considered as disengagement events when the size of decrease in force was  
661 higher than the standard deviation of a 3 ms window either right before or right after the  
662 monotonic decrease event.

663 For data analysis, in-house software written in LabVIEW was used, while for  
664 statistical analysis, curve fitting and graphs Origin 2018b software was used, as described

665 previously (19). The cumulative probability distributions for the time intervals between  
666 successive force ramps were fit using the tri-exponential decay function:

667 
$$P(t) = A_0 - \sum_{i=1}^3 A_i e^{-(t-t_0)/\tau_i}$$

668 All the parameters were free, except  $t_0$  which was set equal to 0.5 ms and corresponds  
669 the temporal resolution of the optical tweezers' data. The final amplitude values reported  
670 in Table I are relative values divided by their total sum  $\sum A_i$  such that the probability density  
671 is normalized to 1 over the observed range of values  $t \geq t_0$  instead of  $t \geq 0$ , and  $A_0 = 1$  (27,  
672 48, 49). The kinetic modeling in Fig. 6 was done using the kinetics simulator Tenua  
673 (<http://bililite.com/tenua/>).

674

### 675 **TIRF Experiments**

676 Single-molecule tracking of GFP-labeled KIF1A-WT and KIF1A-SW were  
677 performed on a Nikon TE2000 TIRF microscope at 21 °C, as described previously (40,  
678 50, 51). Flow cells were prepared by flowing in 2 mg/ml casein, followed by full-length  
679 rigor kinesin (40) and taxol-stabilized, Cy5 (GE Healthcare) labeled microtubules. The  
680 microtubules were incubated for 30 sec, followed by a wash, and repeated 2x. Motors  
681 were diluted to 200-500 pM and added to the flow cell in the presence of 2 mM ATP and  
682 imaged at 5 fps. The kymographs were analyzed manually using Fiji (NIH) (52) to  
683 determine the run lengths, velocities and landing rates.

684

### 685 **Stopped Flow Experiments**

686 Stopped-flow experiments were performed using an Applied Photophysics SX20  
687 spectrofluorometer at 25 °C in BRB80 buffer, as previously described (14, 53). For  $k_{on}^{Mt}$   
688 measurements, a solution of 150 nM motor dimers and 0.25 mM free mADP was flushed  
689 against a solution containing 5  $\mu$ M Taxol, 1 mM ATP, varying concentrations of taxol-  
690 stabilized microtubules (all final chamber concentrations). After mixing, mADP released  
691 from the bound head produced a decrease in fluorescence at 356 nm, which was fit with  
692 a single exponential to determine the  $k_{obs}$  at each microtubule concentration. The  
693 averaged trace of 5–7 consecutive shots was fit and reported for each trial. Linear fit to  
694 the rates versus the microtubule concentration gives the bimolecular on-rate (14, 53).

695

## 696 **Acknowledgements:**

697 W.O.H. thanks the University of Pennsylvania Physiology Department for hosting a  
698 sabbatical visit in Fall, 2019. This work was supported by NIH grant 5RM1GM136511 and  
699 National Science Foundation Science and Technology Center CMMI: 15-48571 to  
700 E.M.O., and NIH grants R01GM076476 and R35GM139568 to W.O.H, and  
701 F32GM137487 to A.M.G.

702

703

## 704 **References:**

- 705 1. Y. Okada, H. Yamazaki, Y. Sekine-Aizawa, N. Hirokawa, The neuron-specific kinesin superfamily  
706 protein KIF1A is a unique monomeric motor for anterograde axonal transport of synaptic vesicle  
707 precursors. *Cell* **81**, 769-780 (1995).
- 708 2. N. Hirokawa, Y. Noda, Y. Tanaka, S. Niwa, Kinesin superfamily motor proteins and intracellular  
709 transport. *Nat Rev Mol Cell Biol* **10**, 682-696 (2009).
- 710 3. K. Chiba *et al.*, Disease-associated mutations hyperactivate KIF1A motility and anterograde axonal  
711 transport of synaptic vesicle precursors. *Proc Natl Acad Sci U S A* **116**, 18429-18434 (2019).
- 712 4. M. Pennings *et al.*, KIF1A variants are a frequent cause of autosomal dominant hereditary spastic  
713 paraplegia. *European journal of human genetics : EJHG* **28**, 40-49 (2020).
- 714 5. Y. Okada, N. Hirokawa, A processive single-headed motor: kinesin superfamily protein KIF1A.  
715 *Science* **283**, 1152-1157 (1999).
- 716 6. Y. Okada, N. Hirokawa, Mechanism of the single-headed processivity: diffusional anchoring  
717 between the K-loop of kinesin and the C terminus of tubulin. *Proc Natl Acad Sci U S A* **97**, 640-645  
718 (2000).
- 719 7. V. Soppina *et al.*, Dimerization of mammalian kinesin-3 motors results in superprocessive motion.  
720 *Proc Natl Acad Sci U S A* **111**, 5562-5567 (2014).
- 721 8. V. Soppina, K. J. Verhey, The family-specific K-loop influences the microtubule on-rate but not the  
722 superprocessivity of kinesin-3 motors. *Mol Biol Cell* **25**, 2161-2170 (2014).
- 723 9. D. V. Lessard *et al.*, Polyglutamylation of tubulin's C-terminal tail controls pausing and motility of  
724 kinesin-3 family member KIF1A. *J Biol Chem* **294**, 6353-6363 (2019).
- 725 10. S. R. Norris *et al.*, A method for multiprotein assembly in cells reveals independent action of  
726 kinesins in complex. *J Cell Biol* **207**, 393-406 (2014).
- 727 11. G. Arpag, S. Shastry, W. O. Hancock, E. Tuzel, Transport by populations of fast and slow kinesins  
728 uncovers novel family-dependent motor characteristics important for in vivo function. *Biophys J*  
729 **107**, 1896-1904 (2014).
- 730 12. G. Arpag *et al.*, Motor Dynamics Underlying Cargo Transport by Pairs of Kinesin-1 and Kinesin-3  
731 Motors. *Biophys J* **116**, 1115-1126 (2019).
- 732 13. B. G. Budaitis *et al.*, Pathogenic mutations in the kinesin-3 motor KIF1A diminish force generation  
733 and movement through allosteric mechanisms. *J Cell Biol* **220** (2021).
- 734 14. T. M. Zaniewski, A. M. Gicking, J. Fricks, W. O. Hancock, A kinetic dissection of the fast and  
735 superprocessive kinesin-3 KIF1A reveals a predominant one-head-bound state during its  
736 chemomechanical cycle. *J Biol Chem* **295**, 17889-17903 (2020).

- 737 15. G. Scarabelli *et al.*, Mapping the Processivity Determinants of the Kinesin-3 Motor Domain.  
738 *Biophys J* **109**, 1537-1540 (2015).
- 739 16. J. Ren *et al.*, Structural Delineation of the Neck Linker of Kinesin-3 for Processive Movement. *J Mol*  
740 *Biol* **430**, 2030-2041 (2018).
- 741 17. M. Tomishige, D. R. Klopfenstein, R. D. Vale, Conversion of Unc104/KIF1A Kinesin into a Processive  
742 Motor After Dimerization. *Science* **297**, 2263-2267 (2002).
- 743 18. H. Khataee, J. Howard, Force Generated by Two Kinesin Motors Depends on the Load Direction  
744 and Intermolecular Coupling. *Phys Rev Lett* **122**, 188101-188106 (2019).
- 745 19. S. Pyrpasopoulos, H. Shuman, E. M. Ostap, Modulation of Kinesin's Load-Bearing Capacity by  
746 Force Geometry and the Microtubule Track. *Biophys J* **118**, 243-253 (2020).
- 747 20. M. J. deCastro, R. M. Fondecave, L. A. Clarke, C. F. Schmidt, R. J. Stewart, Working strokes by single  
748 molecules of the kinesin-related microtubule motor ncd. *Nat Cell Biol* **2**, 724-729 (2000).
- 749 21. J. W. Hammond *et al.*, Mammalian Kinesin-3 motors are dimeric in vivo and move by processive  
750 motility upon release of autoinhibition. *PLoS Biol* **7**, e72 (2009).
- 751 22. S. Niwa *et al.*, Autoinhibition of a Neuronal Kinesin UNC-104/KIF1A Regulates the Size and Density  
752 of Synapses. *Cell reports* **16**, 2129-2141 (2016).
- 753 23. K. Svoboda, C. F. Schmidt, B. J. Schnapp, S. M. Block, Direct observation of kinesin stepping by  
754 optical trapping interferometry. *Nature* **365**, 721-727 (1993).
- 755 24. A. Toleikis, N. J. Carter, R. A. Cross, Backstepping Mechanism of Kinesin-1. *Biophys J* **119**, 1984-  
756 1994 (2020).
- 757 25. S. Sudhakar *et al.*, Germanium nanospheres for ultraresolution picotensiometry of kinesin motors.  
758 *Science* **371** (2021).
- 759 26. K. Sekimoto, J. Prost, Elastic Anisotropy Scenario for Cooperative Binding of Kinesin-Coated Beads  
760 on Microtubules. *J PHYS CHEM B* **120**, 5953-5959 (2016).
- 761 27. W. H. Press, P. B. Flannery, S. A. Teukolsky, W. T. Vetterling, *Numerical Recipes in C: The Art of*  
762 *Scientific Computing 2nd Ed.* (Cambridge University Press, Cambridge, U.K., 1988).
- 763 28. G. M. Alushin *et al.*, High-resolution microtubule structures reveal the structural transitions in  
764 alphabeta-tubulin upon GTP hydrolysis. *Cell* **157**, 1117-1129 (2014).
- 765 29. R. Zhang, G. M. Alushin, A. Brown, E. Nogales, Mechanistic Origin of Microtubule Dynamic  
766 Instability and Its Modulation by EB Proteins. *Cell* **162**, 849-859 (2015).
- 767 30. R. Zhang, B. LaFrance, E. Nogales, Separating the effects of nucleotide and EB binding on  
768 microtubule structure. *Proc Natl Acad Sci U S A* **115**, E6191-E6200 (2018).
- 769 31. J. Estevez-Gallego *et al.*, Structural model for differential cap maturation at growing microtubule  
770 ends. *eLife* **9** (2020).
- 771 32. K. Visscher, M. J. Schnitzer, S. M. Block, Single kinesin molecules studied with a molecular force  
772 clamp. *Nature* **400**, 184-189 (1999).
- 773 33. M. T. Valentine, P. M. Fordyce, T. C. Krzysiak, S. P. Gilbert, S. M. Block, Individual dimers of the  
774 mitotic kinesin motor Eg5 step processively and support substantial loads in vitro. *Nat Cell Biol* **8**,  
775 470-476 (2006).
- 776 34. J. O. Andreasson, S. Shastry, W. O. Hancock, S. M. Block, The Mechanochemical Cycle of  
777 Mammalian Kinesin-2 KIF3A/B under Load. *Curr Biol* **25**, 1166-1175 (2015).
- 778 35. A. J. Lam *et al.*, A highly conserved 310 helix within the kinesin motor domain is critical for kinesin  
779 function and human health. *Sci Adv* **7** (2021).
- 780 36. W. O. Hancock, The Kinesin-1 Chemomechanical Cycle: Stepping Toward a Consensus. *Biophys J*  
781 **110**, 1216-1225 (2016).
- 782 37. S. P. Gilbert, M. R. Webb, M. Brune, K. A. Johnson, Pathway of processive ATP hydrolysis by  
783 kinesin. *Nature* **373**, 671-676 (1995).

- 784 38. K. M. Brenda, C. A. Sontag, W. M. Saxton, S. P. Gilbert, A kinesin mutation that uncouples motor  
785 domains and desensitizes the gamma-phosphate sensor. *J Biol Chem* **275**, 22187-22195 (2000).
- 786 39. D. D. Hackney, Pathway of ADP-stimulated ADP release and dissociation of tethered kinesin from  
787 microtubules. implications for the extent of processivity. *Biochemistry* **41**, 4437-4446 (2002).
- 788 40. K. J. Mickolajczyk *et al.*, Kinetics of nucleotide-dependent structural transitions in the kinesin-1  
789 hydrolysis cycle. *Proc Natl Acad Sci U S A* **112**, E7186-7193 (2015).
- 790 41. G. Woehlke *et al.*, Microtubule interaction site of the kinesin motor. *Cell* **90**, 207-216 (1997).
- 791 42. P. Guedes-Dias *et al.*, Kinesin-3 Responds to Local Microtubule Dynamics to Target Synaptic Cargo  
792 Delivery to the Presynapse. *Curr Biol* **29**, 268-282 e268 (2019).
- 793 43. T. R. Zahn *et al.*, Dense core vesicle dynamics in *Caenorhabditis elegans* neurons and the role of  
794 kinesin UNC-104. *Traffic* **5**, 544-559 (2004).
- 795 44. E. P. Karasmanis *et al.*, Polarity of Neuronal Membrane Traffic Requires Sorting of Kinesin Motor  
796 Cargo during Entry into Dendrites by a Microtubule-Associated Septin. *Dev Cell* **46**, 518-524  
797 (2018).
- 798 45. D. P. McVicker *et al.*, Transport of a kinesin-cargo pair along microtubules into dendritic spines  
799 undergoing synaptic plasticity. *Nature communications* **7**, 12741 (2016).
- 800 46. C. I. Maeder, A. San-Miguel, E. Y. Wu, H. Lu, K. Shen, In vivo neuron-wide analysis of synaptic  
801 vesicle precursor trafficking. *Traffic* **15**, 273-291 (2014).
- 802 47. Q. Feng, K. J. Mickolajczyk, G. Y. Chen, W. O. Hancock, Motor Reattachment Kinetics Play a  
803 Dominant Role in Multimotor-Driven Cargo Transport. *Biophys J* **114**, 400-409 (2018).
- 804 48. P. Bevington, D. K. Robinson, *Data Reduction and Error Analysis for the Physical Sciences* (McGraw-  
805 Hill Higher Education, New York, NY, ed. 3rd, 2003).
- 806 49. M. S. Woody, J. H. Lewis, M. J. Greenberg, Y. E. Goldman, E. M. Ostap, MEMLET: An Easy-to-Use  
807 Tool for Data Fitting and Model Comparison Using Maximum-Likelihood Estimation. *Biophys J* **111**,  
808 273-282 (2016).
- 809 50. S. Shastry, W. O. Hancock, Interhead tension determines processivity across diverse N-terminal  
810 kinesins. *Proc Natl Acad Sci U S A* **108**, 16253-16258 (2011).
- 811 51. S. Shastry, W. O. Hancock, Neck linker length determines the degree of processivity in Kinesin-1  
812 and Kinesin-2 motors. *Current Biology* **20**, 939-943 (2010).
- 813 52. J. Schindelin *et al.*, Fiji: an open-source platform for biological-image analysis. *Nat Methods* **9**, 676-  
814 682 (2012).
- 815 53. G. Y. Chen, D. F. Arginteanu, W. O. Hancock, Processivity of the kinesin-2 KIF3A results from rear  
816 head gating and not front head gating. *J Biol Chem* **290**, 10274-10294 (2015).

817

818

819

820

821



## 822 **Supplementary Information:**

823

## 824 **KIF1A is kinetically tuned to be a super-engaging motor under hindering loads**

825

### 826 **Supplementary Methods:**

827

#### 828 **Theoretical estimation of drag coefficients and relaxation times**

829 The drag coefficient  $\gamma_{\text{microsphere}}$  of a microsphere with radius  $r_{\text{microsphere}} = 410$  nm in an  
830 aqueous solution (viscosity coefficient  $\eta = 10^{-9}$  pN·s/nm<sup>2</sup>) is given by the Stokes' law (1)  
831 as  $\gamma_{\text{microsphere}} = 6\pi\eta r_{\text{microsphere}} = 0.77 \times 10^{-5}$  pN·s/nm. The drag coefficient  $\gamma_{\text{dumbbell}}$  of the  
832 microtubule dumbbell can be considered to a first approximation as the sum of the drag  
833 coefficients of the two beads ( $r = 410$  nm) and that of a microtubule segment of length  $L$   
834 = 10  $\mu\text{m}$  (2). Approximating the microtubule as a solid cylinder of radius  $R = 12.5$  nm, the  
835 drag coefficient for motion parallel to the cylindrical axis is  $\gamma_{\text{microtubule}} = 2\pi\eta L / [\ln(L/(2R)) -$   
836  $0.2]$  (1), and therefore  $\gamma_{\text{dumbbell}} = 2 \cdot \gamma_{\text{microsphere}} + \gamma_{\text{microtubule}} = 2.7 \times 10^{-5}$  pN·s/nm =  
837  $3.5 \cdot \gamma_{\text{microsphere}}$ . Since the characteristic relaxation time of a laser trapped object is  $\tau = \gamma/k$ ,  
838 where  $k$  is the stiffness of the laser trap, the microtubule dumbbell will have similar  $\tau$  to  
839 that of a microsphere only if trap stiffness  $k \sim 0.04$  pN/nm is increased by the same factor  
840 as the drag coefficient, i.e.  $3.5 \times 0.04$  pN/nm = 0.14 pN/nm.

841

#### 842 **Calculation speed as a function of force**

843 To calculate the profile of speed as a function of force two different but equivalent  
844 approaches were used:

845 1. The average of the displacement ramps as a function of time was calculated as  
846 previously described (3), and was smoothed using a Savitzky-Golay filter with a 20-point  
847 window. The speed was calculated from the first derivative of the smoothed average  
848 displacement trace. The corresponding force value was calculated by multiplication of the  
849 average displacement value with the optical trap stiffness.

850 2. The speed was calculated for each displacement ramp by linear fit of successive 10  
851 ms window segments. The corresponding force value was calculated by the average  
852 displacement value of each segment multiplied by the optical trap stiffness.

853 Both methods gave similar results as can be seen in Fig. S6.

854

#### 855 **Subtilisin treatment of polymerized microtubules**

856 We adopted a modified version of the protocol from Rodionov et al. (4). Taxol-stabilized  
857 GDP microtubules (50  $\mu\text{M}$  tubulin) were incubated with 1  $\mu\text{M}$  of A subtilisin for 4 hours at  
858 37 °C water bath. The reaction was then blocked by the addition of PMSF to final  
859 concentration of 2 mM and the sample was kept at RT for at least 1 hour before using it  
860 for further experiments. We confirmed by western blot that for shorter incubation periods  
861 the C-terminal tail of  $\alpha$ -tubulin is not fully cleaved as has been reported previously (5)  
862 (Fig. S5). Primary antibodies specific for the C-terminal tail of  $\alpha$  and  $\beta$  tubulin were used  
863 (see Materials and Methods).

864

865

866  
867

868 Supplementary Tables:

869

870

871 Table S1

| Assay       | Construct | % Secondary Events |            |
|-------------|-----------|--------------------|------------|
|             |           | Taxol/GDP MTs      | GMPCPP MTs |
| Single-bead | KIF1A     | 11                 | -          |
|             | KIF5B     | 10                 | -          |
| Three-bead  | KIF1A     | 39                 | 44         |
|             | KIF5B     | 13                 | 22         |
|             | KIF1A-SW  | 26                 | 49         |

872

873

874 Table S2

| Assay  | Construct | Primary Events<br>Taxol/GDP MTs           |                              | Secondary Events<br>Taxol/GDP MTs         |                              | Primary Events<br>GMPCPP MTs              |                              | Secondary Events<br>GMPCPP MTs            |                              |
|--------|-----------|-------------------------------------------|------------------------------|-------------------------------------------|------------------------------|-------------------------------------------|------------------------------|-------------------------------------------|------------------------------|
|        |           | $\langle F_{\text{term}} \rangle$<br>(pN) | Med- $t_{\text{eng}}$<br>(s) | $\langle F_{\text{term}} \rangle$<br>(pN) | Med- $t_{\text{eng}}$<br>(s) | $\langle F_{\text{term}} \rangle$<br>(pN) | Med- $t_{\text{eng}}$<br>(s) | $\langle F_{\text{term}} \rangle$<br>(pN) | Med- $t_{\text{eng}}$<br>(s) |
| 1-bead | KIF1A     | 2.2 ± 0.99                                | 0.062                        | 2.6 ± 0.77                                | 0.023                        | -                                         | -                            |                                           |                              |
| 3-bead | KIF1A     | 4.1 ± 1.8                                 | 0.069                        | 5.0 ± 0.11                                | 0.067                        | 3.2 ± 1.3                                 | 0.065                        | 4.3 ± 1.5                                 | 0.079                        |
|        | KIF1A-SW  | 3.5 ± 1.4                                 | 0.039                        | 4.7 ± 1.4                                 | 0.030                        | 3.4 ± 1.5                                 | 0.033                        | 4.9 ± 1.6                                 | 0.043                        |

875

876 Table S3

| Construct              | $\langle \text{Speed} \rangle$ ( $\mu\text{m/s}$ ) | $\langle \text{Run Length} \rangle$ ( $\mu\text{m}$ ) | Med- $t_{\text{eng}}$ (s) |
|------------------------|----------------------------------------------------|-------------------------------------------------------|---------------------------|
| KIF1A                  | 1.1 ± 0.38                                         | 6.3 ± 4.2 <sup>(*)</sup>                              | 3.75                      |
| KIF1A-SW               | 1.3 ± 0.42                                         | 1.1 ± 0.56                                            | 0.73                      |
| KIF1A & Subtilisin MTs | 1.3 ± 0.39                                         | 1.8 ± 1.1                                             | 1.3                       |

877 <sup>(\*)</sup> The value has been corrected for events in which the motor runs all the way to the end  
878 of the microtubule (6).

879

880 Supplementary Figures:

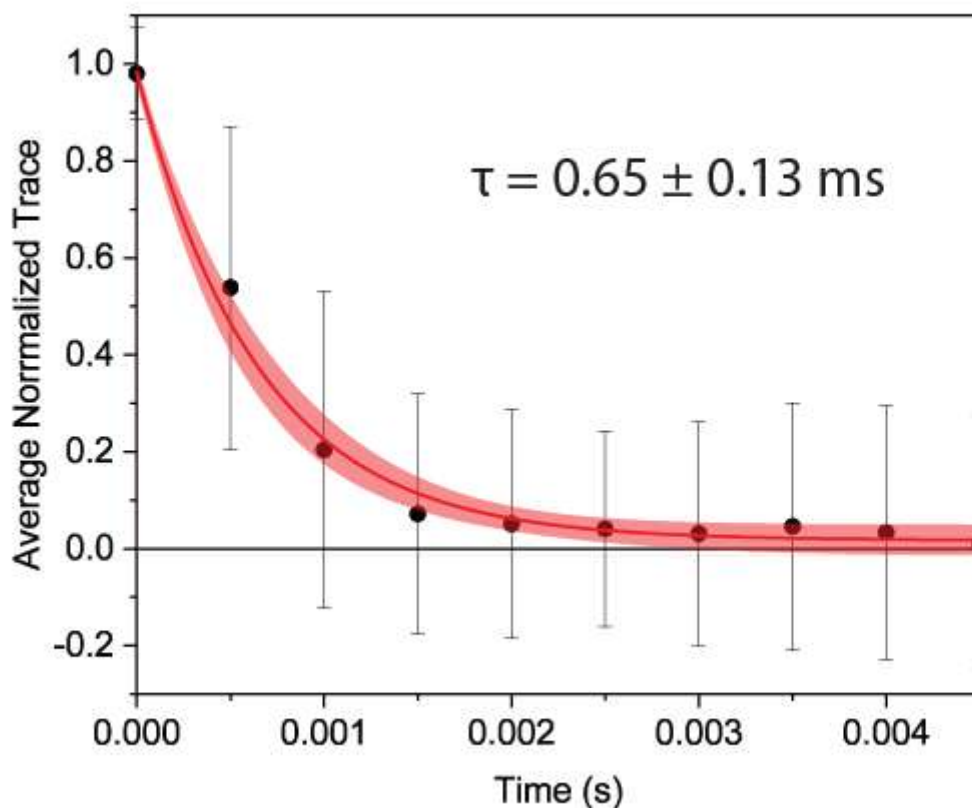

881  
882  
883  
884  
885  
886  
887  
888  
889

**Figure S1: Average relaxation trace for 3-Bead assay.**

Relaxation traces from one dumbbell that correspond to either primary or secondary events and were strictly monotonic within 5 ms were normalized and then averaged (scatter points). Error bars correspond to standard deviations. The red line corresponds to single-exponential curve fitting and the 95% confidence band is indicated by the lighter red color.

890

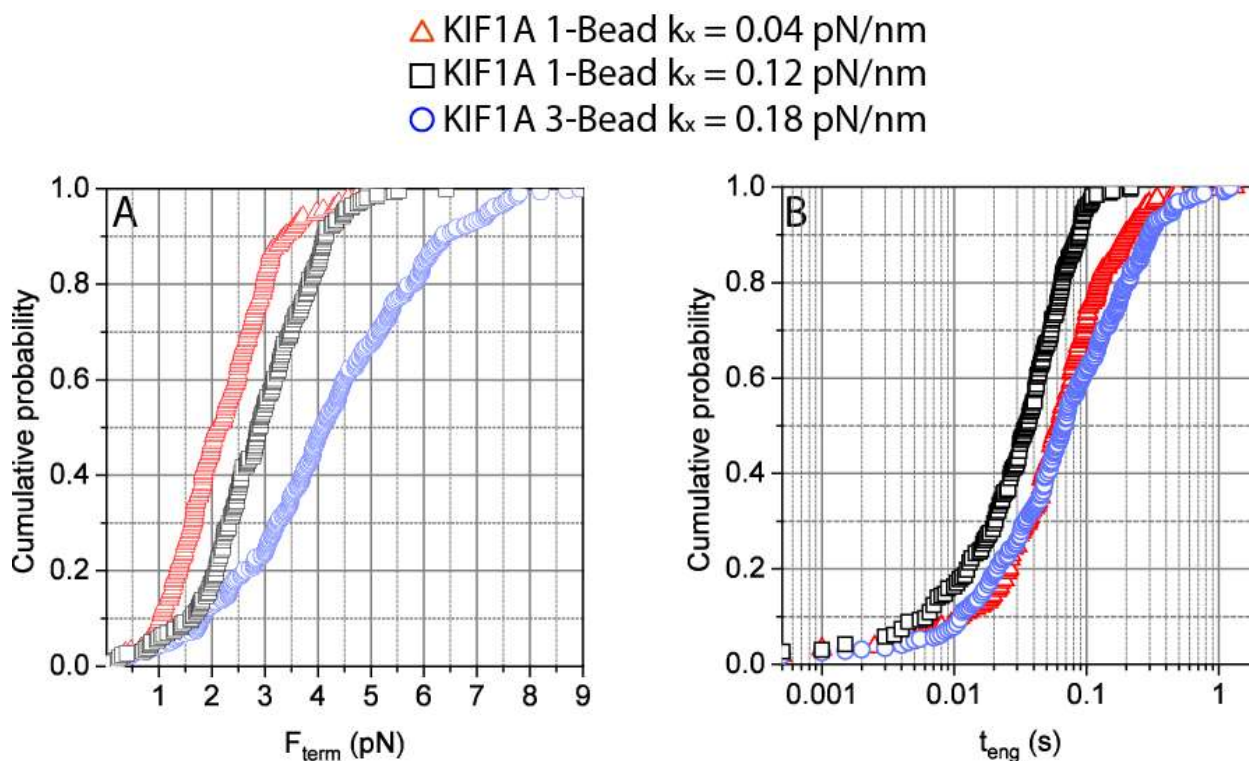

891

892

893

894

895

896

897

898

899

900

901

902

**Figure S2: Comparison of 1-bead data at higher and lower stiffness, with the 3-bead assay.**

Cumulative probability distributions of terminal forces (A) and force ramp durations (B) for the single-bead and three-bead assays. To test whether larger the  $F_{\text{term}}$  in the three-bead assay (blue, open circles) was due to the higher trap stiffness, the trap stiffness was tripled in the single-bead assay from 0.04 pN/nm (red, open upright triangle) to 0.12 pN/nm (black, open square). Although there was a moderate shift toward the three-bead values,  $F_{\text{term}}$  values are still clearly smaller in the one-bead assay. For  $t_{\text{eng}}$ , increasing the single-bead trap stiffness closer to the three-bead value shortened  $t_{\text{eng}}$ , reflecting the faster dissociation rates under load in the single-bead assay.

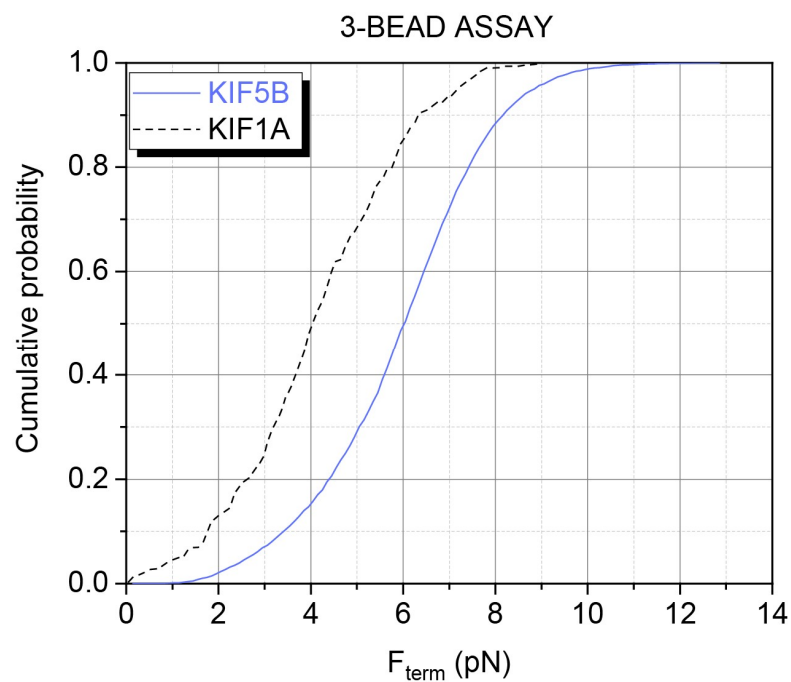

903

904 **Figure S3: Cumulative probability of  $F_{\text{term}}$  for KIF1A and KIF5B in the three-bead**  
905 **assay.**

906

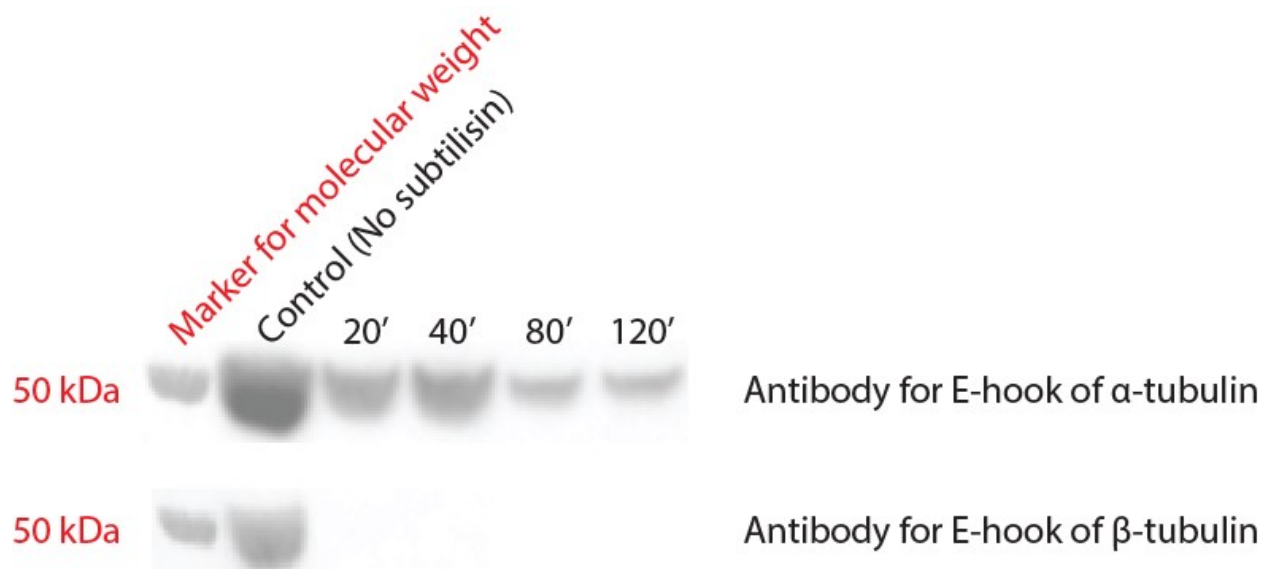

907  
908  
909  
910  
911  
912  
913  
914

**Figure S4: Time-course of subtilisin mediated cleavage of tubulin's C-terminal tails from polymerized microtubules stabilized with Taxol.**

Western-blot against the C-termini of  $\alpha$  and  $\beta$  tubulin after treatment of polymerized microtubules with subtilisin at 37 °C for 20, 40, 80 and 120 min (see Supplemental Materials and Methods).

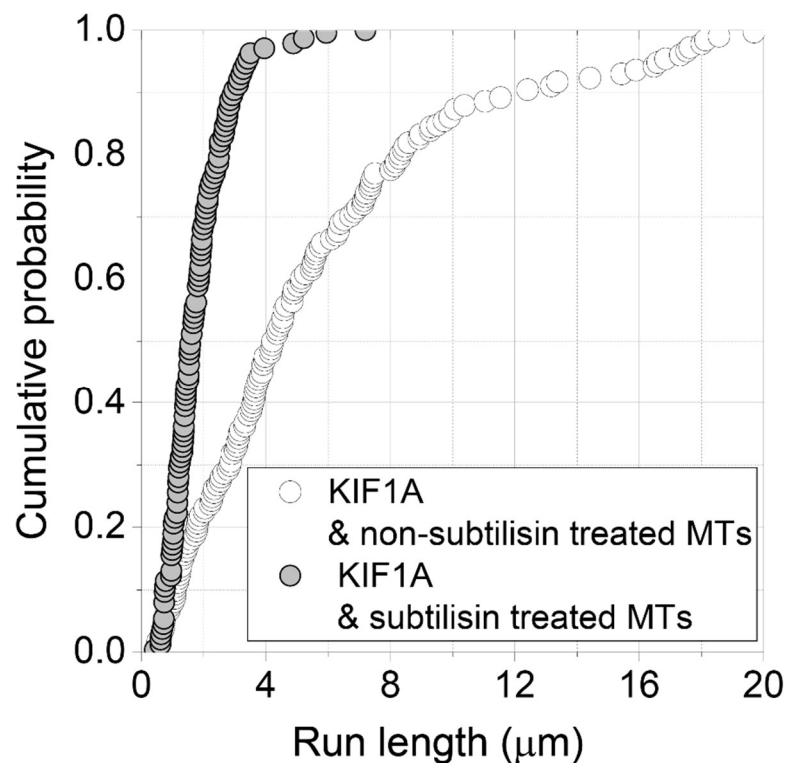

915

916 **Figure S5: Unloaded run length of KIF1A on MTs that were treated and not with**  
917 **subtilisin.**

918 Cumulative probability of the run length for single KIF1A molecules observed under  
919 TIRF microscopy in BRB 80 buffer when microtubules were treated with subtilisin (gray  
920 filled circle) and not (open black circles).

921



922

923

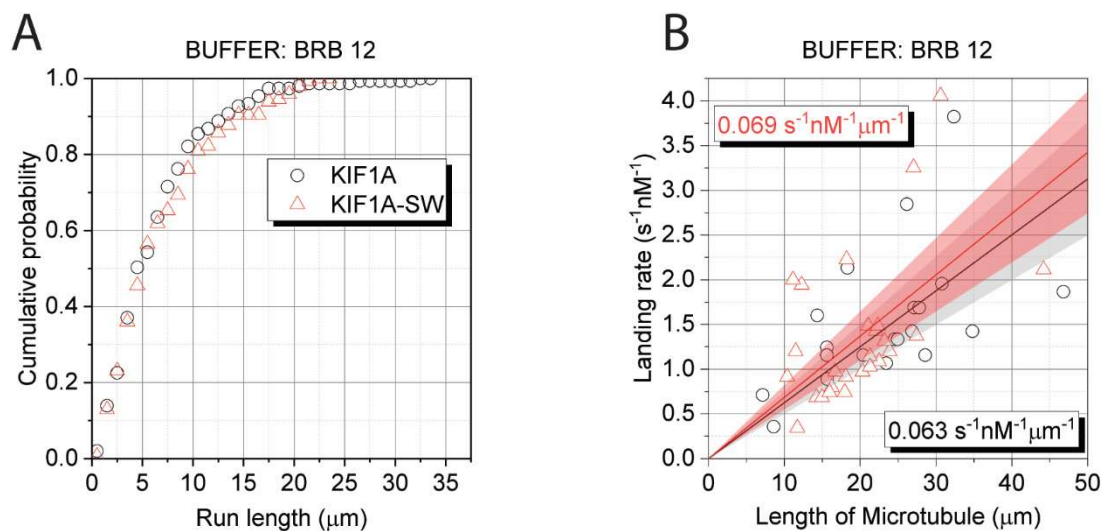

924

925 **Figure S6: Run length and landing rate of KIF1A and KIF1A-SW in buffer BRB12.**

926 (A) Cumulative probability of the run length and (B) landing rates for single KIF1A (black)  
927 and KIF1A-SW (red) molecules observed under TIRF microscopy in BRB12 buffer.

928

929

930

931

932

933

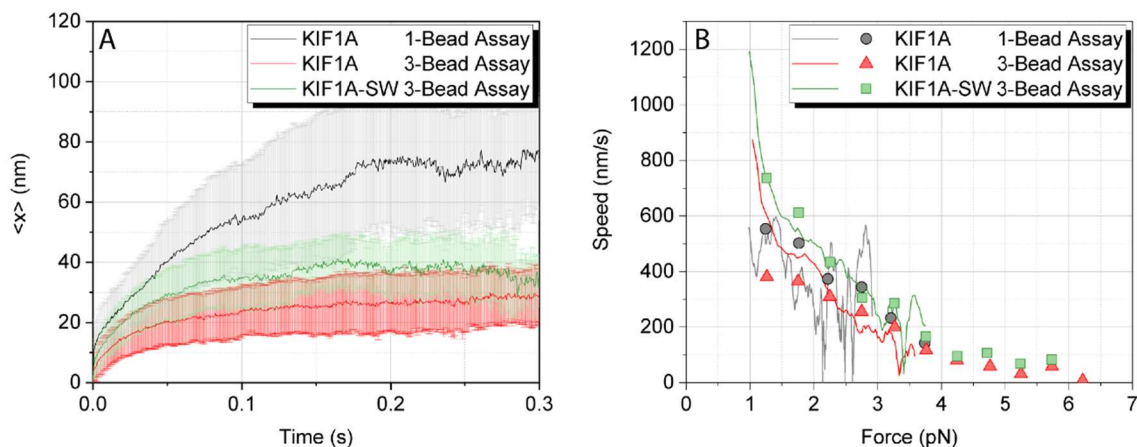

934

935

**Figure S7: Ensemble trajectories and force-velocity curve.**

936 A. Ensemble average of displacement ramps for single- and three-bead assays and  
937 KIF1A constructs using only the primary events,

938 B. Speed as a function of force calculated either from the derivative of the ensemble  
939 average trace (continuous line) or by piecewise calculation of the velocity for each  
940 displacement ramp over a 10 ms time window (not sliding) and subsequent  
941 averaging over all displacement ramps for each assay and KIF1A construct  
942 (scatter points), as described in Supplemental materials and methods.

943

944

945

946

947

948

949

950

951

952

953

954

955

956

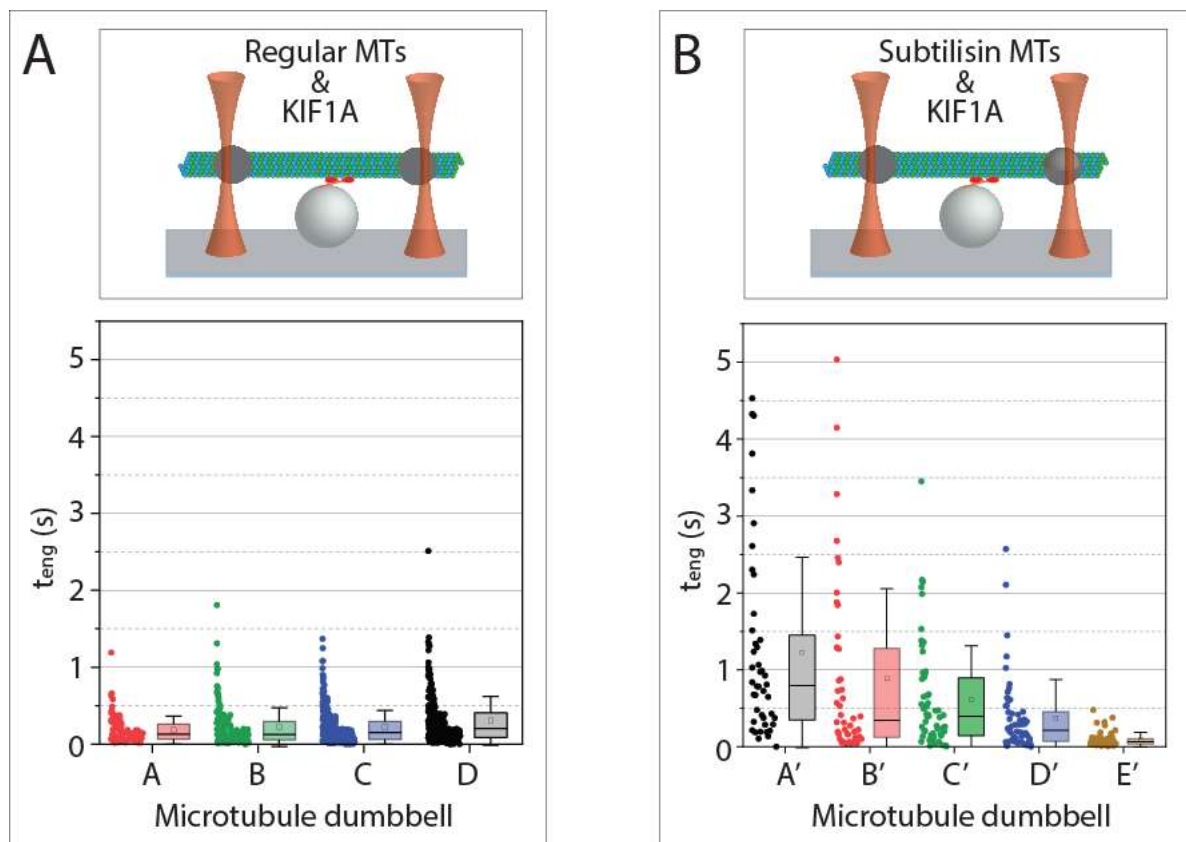

957

958

959

960

961

**Figure S8: Three-bead assay using subtilisin treated microtubules.**

Statistics-box plot of the attachment durations  $t_{eng}$  between KIF1A single-molecules and (A) microtubule dumbbells not treated with subtilisin and (B) microtubule dumbbells after treatment with subtilisin A (see Supplemental Materials and Methods).

962

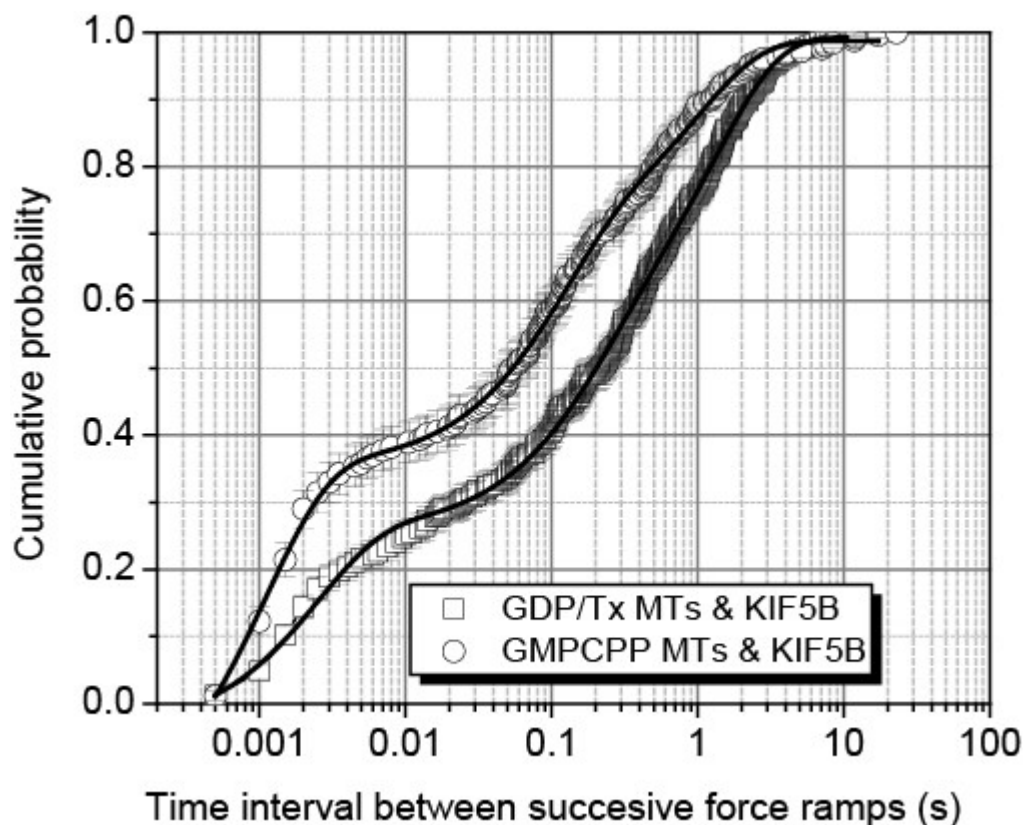

963

964

965 **Figure S9: Comparison of KIF5B restart times on different microtubules.**

966 Cumulative probability plot of the time intervals between successive force ramps for KIF5B  
967 on taxol (open squares) and GMPCPP (open circles) stabilized microtubules, using the  
968 three-bead assay. Error bars are calculated using the bootstrap method (7) and the solid  
969 lines represent fitting to three-exponential decay function (see Materials and Methods).

970

#### 971 **Supplementary References:**

- 972 1. J. Howard, *Mechanics of Motor Proteins and the Cytoskeleton* (Sinauer Associates, Inc.,  
973 Sunderland, MA, ed. 1st., 2001), pp. 367.
- 974 2. S. Pyrpassopoulos *et al.*, Force Generation by Membrane-Associated Myosin-I. *Sci Rep* **6**, 25524  
975 (2016).
- 976 3. S. Pyrpassopoulos, H. Shuman, E. M. Ostap, Modulation of Kinesin's Load-Bearing Capacity by  
977 Force Geometry and the Microtubule Track. *Biophys J* **118**, 243-253 (2020).
- 978 4. V. I. Rodionov, F. K. Gyoeva, A. S. Kashina, S. A. Kuznetsov, V. I. Gelfand, Microtubule-associated  
979 proteins and microtubule-based translocators have different binding sites on tubulin molecule. *J*  
980 *Biol Chem* **265**, 5702-5707 (1990).
- 981 5. B. M. Paschal, R. A. Obar, R. B. Vallee, Interaction of brain cytoplasmic dynein and MAP2 with a  
982 common sequence at the C terminus of tubulin. *Nature* **342**, 569-572 (1989).
- 983 6. T. M. Zaniewski, A. M. Gicking, J. Fricks, W. O. Hancock, A kinetic dissection of the fast and  
984 superprocessive kinesin-3 KIF1A reveals a predominant one-head-bound state during its  
985 chemomechanical cycle. *J Biol Chem* **295**, 17889-17903 (2020).

986 7. W. H. Press, P. B. Flannery, S. A. Teukolsky, W. T. Vetterling, *Numerical Recipes in C: The Art of*  
987 *Scientific Computing 2nd Ed.* (Cambridge University Press, Cambridge, U.K., 1988).

988

989
